# Supplementary material for: Discovering the ‘Dark matters’ in expression data of miRNA based on the miRNA-mRNA and miRNA-lncRNA networks
Source: BMC Bioinformatics. 2018 Oct 16;19:379. doi: 10.1186/s12859-018-2410-0 (PMC6192342; doi:10.1186/s12859-018-2410-0)
Supplement: Supplementary file 1 — The 1078 significantly changed miRNA-mRNA interactions. (XLSX 29 kb) [file 12859_2018_2410_MOESM1_ESM.xlsx]

## Sheet: Sheet1
miRNA	gene
hsa-miR-145	NDRG2
hsa-miR-96	HOXA5
hsa-miR-96	SYNM
hsa-miR-183	HOXA5
hsa-miR-21	NFIB
hsa-miR-21	BOC
hsa-miR-182	SYNM
hsa-miR-125b-2	TMTC1
hsa-miR-139	FOXC1
hsa-miR-10b	CENPL
hsa-let-7c	TGFBR3
hsa-miR-10b	NUAK2
hsa-miR-335	NR3C2
hsa-miR-145	HOXA9
hsa-miR-96	HOXA9
hsa-let-7c	CACHD1
hsa-let-7c	AMOTL1
hsa-miR-204	ATP6AP1
hsa-miR-139	KLHL21
hsa-miR-100	H2AFY
hsa-miR-204	THRB
hsa-miR-204	FGD4
hsa-miR-204	ALDH1A2
hsa-miR-100	KANK1
hsa-miR-21	PDGFD
hsa-miR-21	HOXA9
hsa-miR-139	CHD9
hsa-miR-195	ALDH1A2
hsa-let-7c	FOXO1
hsa-let-7c	RFC2
hsa-miR-183	SH3TC2
hsa-miR-139	SSBP2
hsa-miR-204	TGFBR2
hsa-miR-21	OSR1
hsa-miR-10b	SFRP1
hsa-miR-100	ATP1A2
hsa-let-7c	CKS2
hsa-let-7c	AP1S1
hsa-miR-204	CACHD1
hsa-miR-125b-2	AMOTL1
hsa-miR-195	FGF2
hsa-miR-204	CHRDL1
hsa-miR-125b-1	NR3C1
hsa-miR-335	NFIB
hsa-miR-139	NLGN4X
hsa-let-7c	LHFP
hsa-miR-10b	PER1
hsa-miR-99a	GNAL
hsa-miR-10b	ID4
hsa-miR-145	PDGFD
hsa-miR-182	HOXA9
hsa-miR-125b-2	RASSF9
hsa-let-7c	H2AFZ
hsa-miR-139	CCT5
hsa-miR-204	AP1S1
hsa-miR-195	CLIP4
hsa-miR-182	TCEAL7
hsa-miR-204	MYOC
hsa-miR-204	NTRK2
hsa-miR-10b	METTL7A
hsa-miR-99a	AKAP2
hsa-miR-100	ASPA
hsa-miR-145	LRRC2
hsa-miR-452	ITPRIPL1
hsa-let-7c	SH3D19
hsa-miR-139	KPNA2
hsa-miR-204	CDCA3
hsa-miR-100	ABLIM1
hsa-miR-204	RACGAP1
hsa-miR-486	ID4
hsa-miR-96	FAM171A1
hsa-let-7c	SF3B4
hsa-miR-145	NTRK2
hsa-let-7c	RRAGD
hsa-miR-183	CRIM1
hsa-miR-10b	INHBA
hsa-miR-204	RGS6
hsa-miR-182	FBXW7
hsa-miR-183	KY
hsa-let-7c	FIGN
hsa-miR-224	SYNM
hsa-miR-99a	ZBTB4
hsa-miR-195	GNAL
hsa-miR-100	KPNA2
hsa-miR-204	ADCYAP1R1
hsa-let-7c	FANCI
hsa-miR-204	SMOC1
hsa-let-7c	QKI
hsa-miR-125b-2	SOBP
hsa-let-7c	MEF2C
hsa-let-7c	CCNB2
hsa-let-7c	EZH2
hsa-miR-145	ALDH3A1
hsa-miR-195	KANK1
hsa-miR-204	TXNIP
hsa-miR-21	SAMD5
hsa-miR-140	DST
hsa-let-7c	CRY2
hsa-miR-100	PLK1
hsa-let-7c	EIF4A3
hsa-miR-10b	ZNF502
hsa-miR-125b-2	HN1L
hsa-miR-10b	HIST3H2BB
hsa-miR-195	RACGAP1
hsa-miR-592	EPHA4
hsa-let-7b	DMD
hsa-miR-10b	POC1A
hsa-miR-139	PKIA
hsa-miR-139	SORBS2
hsa-miR-100	MMP13
hsa-miR-10b	LRRC59
hsa-miR-183	RNF145
hsa-miR-145	RPS6KA3
hsa-miR-204	STAC
hsa-miR-195	TGFBR3
hsa-miR-99a	POGK
hsa-miR-335	DST
hsa-miR-10a	HOXA3
hsa-miR-145	EGFR
hsa-miR-195	TBRG1
hsa-miR-21	TRIM2
hsa-miR-100	PVRL3
hsa-miR-195	CRIM1
hsa-miR-99a	STEAP4
hsa-let-7c	SEC14L1
hsa-miR-10b	CCNA2
hsa-miR-195	PPAP2B
hsa-let-7c	ADH5
hsa-miR-21	EPHA4
hsa-miR-21	BDH2
hsa-miR-10b	SH3TC2
hsa-miR-204	PALM2-AKAP2
hsa-miR-1468	TMTC1
hsa-miR-195	SH3BGRL2
hsa-let-7c	ESPL1
hsa-miR-204	CREB5
hsa-miR-223	DMD
hsa-let-7c	INTS7
hsa-miR-195	AMOTL1
hsa-miR-195	GABARAPL1
hsa-miR-210	HIF3A
hsa-miR-495	FGF2
hsa-miR-139	BMPR1A
hsa-miR-96	SLAIN1
hsa-miR-204	NUDT7
hsa-miR-204	PHKG2
hsa-miR-299	TSLP
hsa-miR-200c	HOXA5
hsa-let-7c	MPL
hsa-miR-100	QKI
hsa-miR-144	ID4
hsa-miR-195	TMEM100
hsa-let-7c	HIST1H2BK
hsa-miR-21	PARP1
hsa-miR-335	HOXA2
hsa-miR-125b-1	S1PR1
hsa-miR-204	SLC39A11
hsa-miR-592	SLC35A2
hsa-let-7c	RRM2
hsa-let-7c	EPHA4
hsa-miR-10b	FAM13A
hsa-miR-215	FAM126A
hsa-let-7c	SLC20A1
hsa-miR-99a	TYMS
hsa-miR-1247	CDC14B
hsa-miR-21	PTX3
hsa-miR-10a	ALDH1A2
hsa-miR-21	PIK3R1
hsa-miR-342	ID4
hsa-miR-10b	EXTL3
hsa-miR-204	AKAP2
hsa-miR-665	CD300LG
hsa-miR-100	HIST2H2AA3
hsa-miR-183	FAT2
hsa-miR-100	RRM2
hsa-miR-204	STEAP4
hsa-miR-335	CYP39A1
hsa-let-7c	SBDS
hsa-let-7c	ECHDC1
hsa-miR-195	HDGF
hsa-miR-195	RPS6KA3
hsa-miR-204	MBNL1
hsa-miR-204	BVES
hsa-miR-215	SYNM
hsa-miR-10b	FBXO31
hsa-miR-497	CLIP4
hsa-miR-10b	PLK1
hsa-miR-125b-2	CCDC152
hsa-let-7c	SLC19A3
hsa-miR-21	PELI1
hsa-miR-335	LRIG3
hsa-miR-96	SRXN1
hsa-miR-335	USP44
hsa-let-7c	VCL
hsa-miR-100	HIST1H3J
hsa-miR-99a	RNF187
hsa-miR-1307	ITIH5
hsa-miR-335	CNTNAP3
hsa-let-7c	HNRNPU
hsa-let-7c	MTUS1
hsa-miR-195	CDADC1
hsa-let-7c	CCNG1
hsa-miR-10b	BUB1
hsa-miR-100	CBX3
hsa-miR-1247	ZDBF2
hsa-miR-195	SLC9A6
hsa-miR-195	EZH1
hsa-miR-204	TPPP
hsa-miR-100	LIX1L
hsa-miR-1468	FGF2
hsa-miR-204	ARHGAP6
hsa-miR-10b	H6PD
hsa-miR-143	TSHZ2
hsa-miR-100	LDHB
hsa-miR-10b	CLN8
hsa-miR-183	SMYD1
hsa-miR-195	ZBTB16
hsa-miR-200c	NTRK2
hsa-miR-100	PSMA5
hsa-miR-183	MTUS1
hsa-miR-204	LIX1L
hsa-miR-204	PHKG1
hsa-miR-139	FAM162A
hsa-miR-182	BDNF
hsa-miR-204	AMOTL2
hsa-miR-10a	GNAL
hsa-miR-195	AKT3
hsa-miR-98	ADAMTS5
hsa-miR-139	GFRA1
hsa-miR-183	RBM34
hsa-miR-21	MRAP2
hsa-miR-190b	PM20D2
hsa-miR-96	CLIP4
hsa-miR-183	HEY2
hsa-let-7c	GSK3A
hsa-let-7c	MRPS21
hsa-let-7c	NECAB1
hsa-miR-143	SCN2B
hsa-miR-335	TCEAL7
hsa-miR-96	TERF2
hsa-miR-21	PM20D2
hsa-miR-21	LIFR
hsa-miR-10b	AMMECR1
hsa-miR-195	C10orf54
hsa-miR-100	PACSIN1
hsa-miR-10b	TRIM2
hsa-miR-335	SFRP1
hsa-miR-335	PDE5A
hsa-miR-335	SCN3B
hsa-miR-204	HOXA10
hsa-miR-30a	LIFR
hsa-miR-10b	PPARA
hsa-miR-1247	HM13
hsa-miR-139	MRPL9
hsa-miR-140	MMP13
hsa-miR-140	TBRG1
hsa-miR-100	RPL39L
hsa-miR-28	SFXN1
hsa-miR-96	SLC1A1
hsa-let-7c	CCNF
hsa-miR-204	ZCCHC24
hsa-miR-335	MAPK4
hsa-miR-337	CRIM1
hsa-miR-454	TMTC1
hsa-miR-100	ZHX3
hsa-miR-10a	RELN
hsa-miR-10b	TFPI
hsa-miR-145	DUSP6
hsa-miR-183	ZIK1
hsa-miR-195	UBE2Q1
hsa-miR-204	ZNF385D
hsa-miR-335	LMOD1
hsa-miR-195	RUNX1T1
hsa-miR-21	B3GNT5
hsa-let-7c	PEX11B
hsa-miR-10b	MELK
hsa-miR-140	UBE2C
hsa-miR-383	PEAR1
hsa-miR-145	SMAD4
hsa-let-7c	RAB40C
hsa-miR-10b	EPHA4
hsa-miR-183	LRP6
hsa-miR-204	PLCXD3
hsa-let-7c	HIST1H2BD
hsa-miR-204	STRBP
hsa-miR-21	VPS36
hsa-miR-10b	CDC6
hsa-miR-1301	TNXB
hsa-miR-148b	BOC
hsa-miR-182	TTC28
hsa-miR-99a	BRD7
hsa-let-7c	DUSP1
hsa-miR-10b	DYNLT1
hsa-miR-1301	SEPHS2
hsa-miR-335	ABCA5
hsa-miR-96	PRKCE
hsa-miR-145	PSAT1
hsa-miR-148b	ADAM33
hsa-miR-183	FUT10
hsa-miR-200a	ANGPTL7
hsa-miR-204	ADCY5
hsa-miR-141	ANGPTL7
hsa-miR-204	E2F2
hsa-miR-130a	MEOX2
hsa-miR-183	TERF2
hsa-miR-21	SSFA2
hsa-miR-130a	TMTC1
hsa-miR-145	SOD2
hsa-miR-15a	TGFBR3
hsa-let-7c	FKBP10
hsa-miR-100	SEPT10
hsa-miR-10b	SCMH1
hsa-miR-182	ARID5B
hsa-miR-335	SCN3A
hsa-miR-99a	MTMR3
hsa-let-7c	PAK4
hsa-miR-139	HMGB2
hsa-miR-139	TMEM170A
hsa-miR-204	EBNA1BP2
hsa-miR-429	TCF7L1
hsa-miR-429	NLGN4X
hsa-let-7c	PRIM2
hsa-miR-1247	SSBP2
hsa-miR-125b-2	ACSBG1
hsa-miR-99a	NDE1
hsa-let-7c	HNRNPA2B1
hsa-miR-140	PSAT1
hsa-let-7c	LMNB2
hsa-miR-335	ID4
hsa-miR-10a	CENPL
hsa-miR-10b	IGSF1
hsa-miR-10b	HNRNPF
hsa-miR-145	SAMD5
hsa-miR-491	NFIB
hsa-miR-100	PAFAH1B1
hsa-miR-10a	ZNF502
hsa-miR-10b	COPS5
hsa-miR-145	ADD3
hsa-miR-192	FAM126A
hsa-miR-195	PHYHIP
hsa-miR-21	PRKCE
hsa-miR-96	TMCO1
hsa-miR-98	TGFBR3
hsa-miR-148b	PPAPDC1A
hsa-miR-192	CNTNAP3
hsa-miR-335	LOXL4
hsa-miR-497	TMTC1
hsa-miR-10b	ACVR2A
hsa-miR-10b	FGD4
hsa-miR-183	ZNF208
hsa-miR-195	RECK
hsa-miR-204	MYOCD
hsa-miR-335	CXCL2
hsa-let-7c	RDX
hsa-miR-182	ZC4H2
hsa-miR-204	WISP1
hsa-miR-206	SFRP1
hsa-miR-28	THRA
hsa-miR-296	SSPN
hsa-let-7c	PLCG2
hsa-miR-10b	CRY2
hsa-miR-139	PDGFRA
hsa-miR-145	ZNF660
hsa-miR-204	MTHFD2
hsa-miR-30a	GNAL
hsa-miR-335	PELI2
hsa-miR-204	NCAPG2
hsa-miR-215	CNTNAP3
hsa-miR-335	TSLP
hsa-miR-100	ALG3
hsa-miR-1266	TSLP
hsa-miR-132	ANKRD29
hsa-miR-139	CIAPIN1
hsa-miR-140	ARID5B
hsa-miR-140	C1orf95
hsa-miR-183	CDK6
hsa-miR-335	SATB1
hsa-miR-497	TBRG1
hsa-miR-96	RAD51
hsa-let-7c	GTF3C1
hsa-let-7c	FBXL3
hsa-miR-10b	HTATIP2
hsa-miR-192	RCBTB2
hsa-miR-195	SLCO3A1
hsa-miR-204	SLC1A1
hsa-miR-96	PODXL
hsa-let-7c	DNAH9
hsa-miR-204	BCL2L2
hsa-miR-21	SOCS5
hsa-miR-28	MAD2L1
hsa-miR-10b	KLF4
hsa-miR-139	NFKB1
hsa-miR-204	ZWILCH
hsa-miR-204	MOCS3
hsa-miR-519d	NFIB
hsa-miR-99a	SKI
hsa-let-7c	DIABLO
hsa-miR-100	UBE2E3
hsa-miR-10b	LMNB1
hsa-miR-139	ROCK2
hsa-miR-182	CHL1
hsa-miR-21	ZNF667
hsa-miR-98	SPARCL1
hsa-let-7c	DNMT1
hsa-let-7c	CRK
hsa-let-7c	LRIG3
hsa-miR-100	MORF4L2
hsa-miR-195	PAFAH1B1
hsa-miR-30a	SEMA6A
hsa-miR-335	TLE4
hsa-miR-96	CCND2
hsa-miR-10b	ACAD8
hsa-miR-301a	TMTC1
hsa-miR-10b	HOXB3
hsa-miR-130b	RGS6
hsa-miR-139	DDX19A
hsa-miR-148b	H2AFZ
hsa-miR-195	CBX4
hsa-miR-204	ANGPTL2
hsa-miR-3614	CD300LG
hsa-miR-665	TMTC1
hsa-miR-99a	CENPN
hsa-let-7c	KREMEN1
hsa-miR-130b	CYYR1
hsa-miR-1468	CRYBG3
hsa-miR-200c	OSR1
hsa-miR-96	EFNB2
hsa-miR-10a	SFRP1
hsa-miR-204	EPHA4
hsa-miR-28	MPL
hsa-miR-335	SH3TC2
hsa-miR-379	NUDT7
hsa-miR-99a	AGTPBP1
hsa-miR-1247	TRAF6
hsa-miR-125b-2	LRTOMT
hsa-miR-202	TGFBR3
hsa-miR-215	PRNP
hsa-miR-340	ITIH5
hsa-miR-497	AMOTL1
hsa-let-7c	SOD2
hsa-let-7c	DDX3X
hsa-miR-195	CDK1
hsa-miR-21	NFAT5
hsa-miR-21	PLD1
hsa-miR-335	MPPED2
hsa-miR-99a	ZNF367
hsa-let-7c	IPO9
hsa-miR-10b	GPCPD1
hsa-miR-139	LRTOMT
hsa-miR-1468	SPG20
hsa-miR-195	SPTBN1
hsa-miR-30a	EGFR
hsa-miR-452	RHOU
hsa-miR-100	CCNG1
hsa-miR-10b	CNKSR3
hsa-miR-877	RGS6
hsa-let-7c	ATP6V1G1
hsa-miR-10b	MRPS14
hsa-miR-1247	MPL
hsa-miR-130b	PLP1
hsa-miR-195	SRPRB
hsa-miR-195	CHEK1
hsa-miR-195	USP53
hsa-miR-195	SLC25A22
hsa-miR-28	KLHL12
hsa-miR-10b	PAFAH1B1
hsa-miR-139	ZNF585B
hsa-miR-340	ANKRD29
hsa-miR-592	EMCN
hsa-let-7c	PDP2
hsa-let-7c	ETNK2
hsa-miR-10b	GSR
hsa-miR-130a	RACGAP1
hsa-miR-140	FGF2
hsa-miR-145	UBXN2A
hsa-miR-183	DOCK1
hsa-miR-100	PLCXD3
hsa-miR-139	ZSWIM7
hsa-miR-204	FOXC1
hsa-miR-30a	MET
hsa-miR-574	DMD
hsa-let-7c	JAZF1
hsa-miR-100	NDE1
hsa-miR-192	NFIB
hsa-miR-21	CDK6
hsa-miR-21	NTF3
hsa-miR-301b	HOXA5
hsa-miR-497	RACGAP1
hsa-miR-99a	RARS
hsa-let-7i	TGFBR3
hsa-miR-145	ZFYVE9
hsa-miR-195	ZDHHC16
hsa-miR-204	CSDE1
hsa-miR-205	ITM2A
hsa-miR-495	PLSCR4
hsa-miR-100	KATNAL1
hsa-miR-139	ORAI2
hsa-miR-204	HCFC2
hsa-miR-99a	DOCK11
hsa-let-7c	CNOT3
hsa-let-7c	DLX4
hsa-let-7c	SYNJ2BP
hsa-miR-10a	COPA
hsa-miR-145	PPP3CA
hsa-miR-183	HMGB2
hsa-miR-195	PSAT1
hsa-miR-483	RASSF9
hsa-miR-487b	CRIM1
hsa-miR-497	GNAL
hsa-miR-891a	SCAMP3
hsa-miR-99a	ITM2B
hsa-let-7b	TGFBR3
hsa-miR-139	FN3K
hsa-miR-195	DNAJC9
hsa-miR-381	ADH1B
hsa-miR-497	FGF2
hsa-let-7c	GARS
hsa-let-7c	HMGA1
hsa-miR-1296	TTC28
hsa-miR-139	DDX6
hsa-miR-192	PSMA5
hsa-miR-96	ATXN1L
hsa-miR-99a	SRPK1
hsa-miR-99a	LMAN2
hsa-let-7c	KIF1B
hsa-miR-204	COL4A3BP
hsa-miR-204	ZNF48
hsa-miR-21	ZNF132
hsa-miR-335	ZDHHC15
hsa-miR-96	CPE
hsa-miR-10b	ARFGEF1
hsa-miR-1247	PPAP2B
hsa-miR-145	APH1A
hsa-miR-200a	FOXC1
hsa-miR-210	HOXA3
hsa-miR-99a	EXTL3
hsa-let-7c	CD59
hsa-miR-10b	PAX6
hsa-miR-10b	FAHD1
hsa-miR-1247	DSN1
hsa-miR-125b-2	TM9SF4
hsa-miR-195	RNPS1
hsa-miR-204	MEIS1
hsa-miR-30a	PLA2G4A
hsa-miR-148b	RGMA
hsa-miR-183	ATP10D
hsa-miR-195	CCNE2
hsa-miR-204	MTA3
hsa-miR-223	LIFR
hsa-miR-30a	ANXA1
hsa-miR-330	TGFBR3
hsa-miR-342	PKP1
hsa-miR-98	PLAGL1
hsa-miR-10b	RTKN2
hsa-miR-1468	NFIB
hsa-miR-195	SNTB2
hsa-miR-195	SH3BP5
hsa-miR-204	SYAP1
hsa-miR-21	HPS5
hsa-miR-21	TSHZ3
hsa-miR-21	PIGX
hsa-miR-30a	HDGF
hsa-miR-3677	KANK1
hsa-let-7c	RALGAPA2
hsa-let-7c	DNA2
hsa-miR-125b-2	SAP30
hsa-miR-30a	TNFRSF10D
hsa-miR-335	MAP2
hsa-miR-379	PARP1
hsa-miR-99a	RUNDC3B
hsa-miR-99a	GSTM5
hsa-miR-10b	DDX58
hsa-miR-129-2	RGS6
hsa-miR-130a	KCNB1
hsa-miR-195	UBE2E3
hsa-miR-195	HOXA10
hsa-miR-204	ZNF747
hsa-miR-1247	BPNT1
hsa-miR-204	BMPR1A
hsa-miR-30c-2	TMTC1
hsa-miR-592	SESN3
hsa-miR-10b	PSMD11
hsa-miR-130a	TBL2
hsa-miR-145	F11R
hsa-miR-145	KREMEN1
hsa-miR-190b	ZNF608
hsa-miR-204	EZR
hsa-miR-99a	FOXRED2
hsa-miR-100	OXCT1
hsa-miR-10a	ID4
hsa-miR-10b	SLC25A30
hsa-miR-10b	GK
hsa-miR-204	SOD2
hsa-miR-21	WHSC1
hsa-miR-301b	NFIB
hsa-miR-592	BTBD3
hsa-miR-891a	TSHZ2
hsa-miR-93	PAMR1
hsa-miR-98	SPRY1
hsa-miR-107	TGFBR3
hsa-miR-10a	EPHA4
hsa-miR-145	IRS1
hsa-miR-148b	H2AFY
hsa-miR-23a	SPRY2
hsa-miR-3662	SYNM
hsa-let-7b	CCNB1
hsa-let-7c	PTMA
hsa-miR-182	ALDH1A3
hsa-miR-183	SMAD4
hsa-miR-195	KIF23
hsa-miR-28	NRN1
hsa-miR-30a	SOBP
hsa-let-7c	BCCIP
hsa-miR-10b	RAPGEF2
hsa-miR-10b	ANP32E
hsa-miR-145	MMP1
hsa-miR-1468	TBRG1
hsa-miR-183	AURKA
hsa-miR-301a	HOXA5
hsa-miR-30a	RBMS3
hsa-miR-452	ITGA9
hsa-miR-485	TMTC1
hsa-let-7c	FUT10
hsa-let-7c	GSG2
hsa-let-7c	ZNF578
hsa-miR-100	IGF2
hsa-miR-10a	ATP1A2
hsa-miR-10b	GRINA
hsa-miR-1247	HJURP
hsa-miR-145	MAP2K6
hsa-miR-148b	LPHN2
hsa-miR-483	ZNF677
hsa-miR-10a	ASB1
hsa-miR-1247	DCP1A
hsa-miR-144	MET
hsa-miR-145	NUDT1
hsa-miR-150	SCN2B
hsa-miR-195	BCL2L2
hsa-miR-195	TUFT1
hsa-miR-195	VCL
hsa-miR-21	EGFR
hsa-miR-381	ZBTB4
hsa-miR-96	BCL2
hsa-miR-10b	PRPF8
hsa-miR-10b	RBM17
hsa-miR-145	PODXL
hsa-miR-204	BCL2
hsa-miR-760	POLR3K
hsa-miR-93	STAT5B
hsa-miR-100	ENTPD7
hsa-miR-10b	EPHA7
hsa-miR-150	KLHL21
hsa-miR-215	DST
hsa-miR-100	TAPBP
hsa-miR-100	ABCB5
hsa-miR-1247	CDNF
hsa-miR-145	PRDM2
hsa-miR-181c	ID4
hsa-miR-183	EGR1
hsa-miR-296	ARF1
hsa-miR-96	KDELR1
hsa-miR-10b	ZNF280B
hsa-miR-10b	C1GALT1
hsa-miR-145	SMAD3
hsa-miR-150	SYNPO2
hsa-miR-340	LIFR
hsa-miR-99a	CIRH1A
hsa-miR-143	ERGIC1
hsa-miR-195	HOXA3
hsa-miR-21	PKD2
hsa-miR-335	POU6F1
hsa-let-7c	CDC42BPA
hsa-let-7c	ARMC8
hsa-let-7c	ITGB3
hsa-miR-10a	YAP1
hsa-miR-125b-1	SOD2
hsa-miR-125b-2	STX12
hsa-miR-139	TCF12
hsa-miR-139	UCP2
hsa-miR-141	TCF7L1
hsa-miR-145	MAP2K4
hsa-miR-183	CYB5D2
hsa-miR-195	DMRT2
hsa-let-7c	NAT8L
hsa-miR-134	KCTD5
hsa-miR-145	CDK6
hsa-miR-204	KCNK1
hsa-miR-592	HS6ST3
hsa-miR-99a	RAD51C
hsa-let-7c	TAF5L
hsa-let-7c	FAM43A
hsa-miR-139	KCND3
hsa-miR-150	PLEKHM3
hsa-miR-183	TRO
hsa-miR-195	TLL1
hsa-miR-204	TCF7L2
hsa-miR-377	CCNB1
hsa-miR-483	PLEKHH2
hsa-miR-485	CD300LG
hsa-miR-584	ZNF208
hsa-miR-99a	LRIG3
hsa-miR-10b	CSGALNACT1
hsa-miR-1468	CYP2U1
hsa-miR-195	CDCA4
hsa-miR-592	PGPEP1
hsa-miR-93	EIF2AK1
hsa-miR-96	PITPNM3
hsa-miR-96	PGK1
hsa-let-7c	DVL3
hsa-miR-10a	ACVR2A
hsa-miR-125b-1	ART4
hsa-miR-127	MMP13
hsa-miR-145	FZD7
hsa-miR-21	SPRY2
hsa-let-7c	KPNA5
hsa-miR-100	PNRC1
hsa-miR-183	CWC25
hsa-miR-195	SKI
hsa-miR-708	FGF2
hsa-let-7c	BCL2L1
hsa-let-7c	DCTN5
hsa-miR-100	TERF2IP
hsa-miR-1468	YAP1
hsa-miR-182	SMAD4
hsa-miR-195	SUN1
hsa-miR-23b	MET
hsa-miR-592	CREB3L2
hsa-miR-944	DPYSL2
hsa-let-7b	NVL
hsa-miR-100	SLFN5
hsa-miR-1247	MTMR10
hsa-miR-1301	SEMA6A
hsa-miR-130a	MET
hsa-miR-139	ZBTB26
hsa-miR-183	ANKRD27
hsa-miR-183	DLX4
hsa-miR-21	PTK2
hsa-miR-218-2	ARID5B
hsa-miR-30d	LIFR
hsa-miR-454	TGFBR2
hsa-miR-940	PLA2G4A
hsa-let-7c	FZD9
hsa-miR-139	ZNF431
hsa-miR-17	NFIB
hsa-miR-483	FOXC1
hsa-miR-483	TBL2
hsa-miR-495	TGFBR2
hsa-miR-592	WRN
hsa-let-7c	EN2
hsa-miR-100	NOP2
hsa-miR-10a	CD59
hsa-miR-139	DERL1
hsa-miR-145	NEDD9
hsa-miR-150	RABIF
hsa-miR-483	RUNDC3B
hsa-miR-592	NMNAT2
hsa-miR-139	ZNF367
hsa-miR-195	CEP55
hsa-miR-195	KATNAL1
hsa-miR-21	PLEKHA2
hsa-miR-210	HOXA9
hsa-miR-210	RUNX1T1
hsa-miR-30a	ERG
hsa-miR-140	RAB31
hsa-miR-183	CLN8
hsa-miR-195	HOXA9
hsa-miR-204	MAPRE2
hsa-miR-21	CALD1
hsa-miR-21	CKAP5
hsa-let-7c	E2F5
hsa-let-7c	SLC12A7
hsa-let-7c	NUP93
hsa-miR-100	PRDX1
hsa-miR-204	ZBTB38
hsa-miR-204	FBXO31
hsa-miR-204	SOS2
hsa-miR-21	TMEM147
hsa-miR-3681	ADAMTS5
hsa-miR-93	DPYSL2
hsa-miR-99a	GPR126
hsa-miR-139	HLA-A
hsa-miR-148b	CRIM1
hsa-miR-186	DMD
hsa-miR-195	BIRC5
hsa-miR-19a	NFIB
hsa-miR-204	ARHGAP29
hsa-miR-204	MAP1LC3B
hsa-miR-335	IGF2BP2
hsa-let-7c	NAA20
hsa-miR-100	RARS
hsa-miR-100	CIRH1A
hsa-miR-204	EFNB2
hsa-miR-301b	EGFR
hsa-miR-483	CRIM1
hsa-miR-100	FOXN2
hsa-miR-204	BDNF
hsa-miR-215	ID4
hsa-miR-29a	S100B
hsa-miR-30a	PCNA
hsa-miR-30c-2	RASSF9
hsa-miR-335	BHLHE41
hsa-miR-100	VLDLR
hsa-miR-10b	XPO7
hsa-miR-10b	KIF21A
hsa-miR-10b	CSRNP3
hsa-miR-1468	PSAT1
hsa-miR-182	PODXL
hsa-miR-183	DTYMK
hsa-miR-21	GLG1
hsa-miR-335	MTUS1
hsa-miR-335	SULT1C4
hsa-miR-3662	SEMA6D
hsa-miR-92b	COPA
hsa-miR-940	TGFBR2
hsa-let-7c	ONECUT2
hsa-miR-10b	HMGN2
hsa-miR-139	ZBTB7A
hsa-miR-148b	TCF7L2
hsa-miR-195	GNG12
hsa-miR-20a	NFIB
hsa-miR-29a	ITIH5
hsa-miR-335	BACH2
hsa-miR-340	PPAP2B
hsa-miR-452	SMAD4
hsa-miR-877	TTC28
hsa-miR-96	CWC25
hsa-miR-98	LIFR
hsa-miR-99a	SYNJ2BP
hsa-let-7c	ACER2
hsa-let-7c	SHMT1
hsa-miR-100	MRPL3
hsa-miR-10b	DNAJC27
hsa-miR-145	ZNF426
hsa-miR-183	FAM110B
hsa-miR-200a	TCF7L1
hsa-miR-204	KNTC1
hsa-miR-224	PELI1
hsa-miR-497	AKT3
hsa-miR-100	NFIA
hsa-miR-1301	FAM13A
hsa-miR-145	MMP14
hsa-miR-204	HNRNPA2B1
hsa-miR-30a	SFXN1
hsa-miR-30a	SULT1C4
hsa-miR-98	CHST3
hsa-miR-100	DNMT1
hsa-miR-10a	METTL7A
hsa-miR-130a	SMOC1
hsa-miR-130b	TGFBR3
hsa-miR-144	LIFR
hsa-miR-145	TPRG1
hsa-miR-148b	NR3C2
hsa-miR-183	C16orf45
hsa-miR-195	HNRNPA2B1
hsa-miR-200b	RND3
hsa-miR-204	ZNF746
hsa-miR-21	TGFBR3
hsa-miR-301a	MEOX2
hsa-miR-342	DUSP6
hsa-miR-497	TGFBR3
hsa-miR-10a	E2F1
hsa-miR-1247	SNRPD1
hsa-miR-130a	TGFBR2
hsa-miR-182	ATXN1L
hsa-miR-183	CTDSPL
hsa-miR-204	TOR1AIP1
hsa-miR-204	IQCE
hsa-miR-33b	PSAT1
hsa-let-7c	ATXN7L3
hsa-let-7c	PMAIP1
hsa-miR-100	NSF
hsa-miR-100	HMGN1
hsa-miR-1307	FGFR1
hsa-miR-183	GLO1
hsa-miR-195	RAB11FIP2
hsa-miR-204	TCF4
hsa-miR-204	UFD1L
hsa-miR-335	GULP1
hsa-miR-342	ZC3H12B
hsa-miR-429	TCEB1
hsa-miR-93	TGFBR2
hsa-let-7c	BRI3BP
hsa-miR-10b	RUNDC3B
hsa-miR-125b-2	IQCE
hsa-miR-130b	ANKRD29
hsa-miR-139	KLF10
hsa-miR-181c	ZDHHC15
hsa-miR-335	TRIM2
hsa-miR-335	HMGCLL1
hsa-miR-4326	AURKA
hsa-miR-497	HOXA3
hsa-miR-99a	ARF5
hsa-let-7i	HIST1H2BK
hsa-miR-10a	POC1A
hsa-miR-1228	NFIB
hsa-miR-140	CDK6
hsa-miR-148a	ID4
hsa-miR-150	PPAP2B
hsa-miR-183	PSMB5
hsa-miR-204	METTL1
hsa-miR-21	UBA1
hsa-let-7c	ANKRD46
hsa-miR-10b	UHRF1
hsa-miR-15a	FGF2
hsa-miR-183	POP7
hsa-miR-195	SMAD3
hsa-miR-195	PHACTR2
hsa-miR-195	MCFD2
hsa-miR-30a	NDEL1
hsa-miR-505	HOXA9
hsa-let-7b	RFC2
hsa-miR-10a	LCA5
hsa-miR-10b	RALBP1
hsa-miR-130b	HOXA5
hsa-miR-140	CUBN
hsa-miR-15a	CLIP4
hsa-miR-192	SMARCA2
hsa-miR-200b	NLGN4X
hsa-miR-21	MEIS1
hsa-miR-30c-2	FAM126A
hsa-miR-452	CDK6
hsa-miR-584	TMEM170A
hsa-miR-10a	PLA2G4A
hsa-miR-125b-2	LSG1
hsa-miR-1307	CDC14B
hsa-miR-149	TMTC1
hsa-miR-182	CASC3
hsa-miR-204	SGPL1
hsa-miR-204	MAFG
hsa-miR-10b	PTPLAD2
hsa-miR-125b-2	POP1
hsa-miR-130a	KLHL21
hsa-miR-139	PAPD4
hsa-miR-139	THY1
hsa-miR-145	JMJD1C
hsa-miR-183	USP22
hsa-miR-183	DKK3
hsa-miR-301b	MYH11
hsa-miR-449a	MET
hsa-miR-654	NFIB
hsa-miR-93	RNF145
hsa-miR-99a	AP2B1
hsa-let-7c	ID4
hsa-let-7c	ZNF200
hsa-miR-10b	MAF
hsa-miR-129-2	KCNB1
hsa-miR-1296	LIFR
hsa-miR-195	CDC25A
hsa-miR-204	PNRC1
hsa-miR-30a	STAU1
hsa-miR-98	RASSF9
hsa-miR-98	CXCL2
hsa-let-7c	TMED5
hsa-miR-128-2	NFIX
hsa-miR-140	THRA
hsa-miR-140	C17orf51
hsa-miR-195	SH3GLB1
hsa-miR-30a	ME3
hsa-miR-432	ARID5B
hsa-miR-497	CRIM1
hsa-let-7c	VPS36
hsa-miR-100	ODC1
hsa-miR-10b	CSNK2A1
hsa-miR-10b	NCOA6
hsa-miR-139	JUN
hsa-miR-139	SYT5
hsa-miR-145	CSRNP3
hsa-miR-148a	BOC
hsa-miR-182	CBX6
hsa-miR-204	DPF3
hsa-miR-204	PLAG1
hsa-miR-556	LRIG3
hsa-miR-98	LRIG3
hsa-miR-1247	PSMB2
hsa-miR-183	GNG5
hsa-miR-183	RFC2
hsa-miR-195	OTUB1
hsa-miR-301b	TCF7L2
hsa-miR-574	AMOTL1
hsa-miR-93	PKD2
hsa-miR-100	TPT1
hsa-miR-106b	NFIB
hsa-miR-130a	PPARA
hsa-miR-135b	IBSP
hsa-miR-15a	PPAP2B
hsa-miR-204	PIK3C2B
hsa-miR-204	ZYG11B
hsa-miR-21	SYNE2
hsa-miR-30a	KPNA2
hsa-miR-335	PPP4R1L
hsa-miR-377	CRIM1
hsa-miR-98	HIST1H2BO
hsa-let-7c	OLR1
hsa-miR-100	EMX1
hsa-miR-10b	KIAA0100
hsa-miR-10b	CCNG1
hsa-miR-125b-2	TTC21B
hsa-miR-127	ADAMTS5
hsa-miR-1301	HDGF
hsa-miR-139	MKL2
hsa-miR-183	AKAP13
hsa-miR-204	PSMB2
hsa-miR-301a	ZBTB4
hsa-miR-485	HIF3A
hsa-miR-589	METTL7A
hsa-miR-140	HDAC4
hsa-miR-148b	RNF150
hsa-miR-193b	TMTC1
hsa-miR-195	HCFC2
hsa-miR-200b	FOXC1
hsa-miR-204	SMAD4
hsa-miR-21	NFKB1
hsa-miR-30a	RBMS2
hsa-miR-335	COPA
hsa-miR-382	TGFBR3
hsa-miR-495	CDK1
hsa-miR-520a	NFIB
hsa-miR-605	NFIB
hsa-let-7c	SIRT1
hsa-miR-100	GFOD1
hsa-miR-10b	MSL3
hsa-miR-10b	YWHAE
hsa-miR-1247	KIAA1614
hsa-miR-139	PDZD8
hsa-miR-139	FNBP4
hsa-miR-1468	RRAGD
hsa-miR-148b	IGSF10
hsa-miR-15a	AMOTL1
hsa-miR-15a	KANK1
hsa-miR-187	RASSF9
hsa-miR-19a	HOXA5
hsa-miR-204	HOOK3
hsa-miR-21	SEMA5A
hsa-miR-21	PTGFR
hsa-miR-2114	PLA2G4A
hsa-miR-296	MAZ
hsa-miR-760	INMT
hsa-miR-98	RFC2
hsa-miR-100	FLT1
hsa-miR-100	MAFG
hsa-miR-10a	FGFR1
hsa-miR-10a	SF3B4
hsa-miR-10b	DVL3
hsa-miR-125b-1	CDNF
hsa-miR-130a	RFC2
hsa-miR-193a	RGMA
hsa-miR-204	WWC2
hsa-miR-30a	NR2F6
hsa-miR-98	PPAP2B
hsa-miR-99a	TRIB2
hsa-miR-10b	GLOD4
hsa-miR-10b	PAICS
hsa-miR-10b	HLA-E
hsa-miR-139	SUGT1
hsa-miR-142	HOXA7
hsa-miR-195	CCND2
hsa-miR-195	DOCK11
hsa-miR-21	RPS6KA3
hsa-miR-494	PROS1
hsa-let-7c	LIMD2
hsa-let-7c	FAM104A
hsa-miR-1247	DUSP19
hsa-miR-195	MTMR3
hsa-miR-195	TCF3
hsa-miR-195	CBFA2T3
hsa-miR-21	GDF5
hsa-miR-223	SATB1
hsa-miR-30a	KIF11
hsa-miR-377	SCN3B
hsa-miR-383	ACADL
hsa-miR-454	ZBTB4
hsa-miR-513c	GNG13
hsa-miR-584	SKI
hsa-miR-96	PAQR4
hsa-miR-96	PPP1R11
hsa-miR-98	A2M
hsa-miR-98	SNRPA1
