# Supplementary material for: Discovering the ‘Dark matters’ in expression data of miRNA based on the miRNA-mRNA and miRNA-lncRNA networks
Source: BMC Bioinformatics. 2018 Oct 16;19:379. doi: 10.1186/s12859-018-2410-0 (PMC6192342; doi:10.1186/s12859-018-2410-0)
Supplement: Supplementary file 2 — The activity scores of 124 above miRNAs in BMMN are shown in Additional file 2. (XLSX 13 kb) [file 12859_2018_2410_MOESM2_ESM.xlsx]

## Sheet: Sheet1
miRNA	Activity Score
hsa-let-7c	11.965
hsa-miR-10b	9.47569
hsa-miR-204	9.35108
hsa-miR-139	6.31698
hsa-miR-100	4.65525
hsa-miR-195	3.7802
hsa-miR-99a	3.14259
hsa-miR-145	2.85203
hsa-miR-183	1.94471
hsa-miR-21	1.90871
hsa-miR-125b-2	1.36974
hsa-miR-592	1.28512
hsa-miR-96	1.19925
hsa-miR-125b-1	1.18302
hsa-miR-182	0.67583
hsa-miR-1247	0.53887
hsa-miR-10a	0.492244
hsa-miR-140	0.389858
hsa-miR-335	0.284519
hsa-miR-30a	0.224257
hsa-miR-1468	0.189897
hsa-miR-28	0.174452
hsa-miR-148b	0.166434
hsa-miR-497	0.122818
hsa-miR-130a	0.120446
hsa-miR-483	0.0853843
hsa-miR-452	0.085362
hsa-miR-98	0.082653
hsa-miR-1301	0.0581601
hsa-miR-210	0.0569728
hsa-miR-190b	0.0403584
hsa-miR-429	0.0372308
hsa-miR-495	0.0371875
hsa-miR-150	0.0340611
hsa-miR-129-2	0.0333375
hsa-miR-301b	0.0291461
hsa-miR-200a	0.0255339
hsa-miR-200c	0.0242826
hsa-miR-215	0.0237188
hsa-miR-144	0.0229037
hsa-miR-15a	0.0218768
hsa-miR-342	0.0211191
hsa-miR-130b	0.0207922
hsa-miR-1307	0.0207398
hsa-miR-340	0.0196863
hsa-miR-200b	0.0190002
hsa-miR-301a	0.0180505
hsa-miR-192	0.0170414
hsa-miR-584	0.0164995
hsa-miR-891a	0.016211
hsa-miR-93	0.0161116
hsa-miR-296	0.0152049
hsa-miR-381	0.0151677
hsa-miR-127	0.0139833
hsa-miR-379	0.0138505
hsa-miR-3677	0.0115329
hsa-miR-143	0.0111726
hsa-miR-760	0.0109146
hsa-miR-224	0.0108756
hsa-miR-1296	0.0103804
hsa-let-7b	0.0102282
hsa-miR-487b	0.0100441
hsa-miR-30c-2	0.00966661
hsa-miR-128-2	0.00915379
hsa-miR-485	0.00844795
hsa-miR-141	0.00833988
hsa-miR-3662	0.00781977
hsa-miR-337	0.00751157
hsa-miR-218-2	0.00737307
hsa-miR-148a	0.00686334
hsa-miR-4326	0.00679342
hsa-miR-223	0.00677519
hsa-miR-181c	0.0064236
hsa-let-7i	0.00637067
hsa-miR-29a	0.00617152
hsa-miR-206	0.00597567
hsa-miR-299	0.00568175
hsa-miR-574	0.00515338
hsa-miR-187	0.00511359
hsa-miR-454	0.00502908
hsa-miR-944	0.00435008
hsa-miR-665	0.00435006
hsa-miR-708	0.00427916
hsa-miR-556	0.00427704
hsa-miR-486	0.00395784
hsa-miR-449a	0.00383861
hsa-miR-1266	0.00377729
hsa-miR-135b	0.00364238
hsa-miR-134	0.0036317
hsa-miR-940	0.00359197
hsa-miR-33b	0.00356169
hsa-miR-491	0.00347903
hsa-miR-589	0.00327921
hsa-miR-432	0.00321813
hsa-miR-377	0.00320956
hsa-miR-193a	0.00312131
hsa-miR-2114	0.00306041
hsa-miR-19a	0.00281346
hsa-miR-654	0.00280115
hsa-miR-382	0.00247133
hsa-miR-877	0.00244848
hsa-miR-3614	0.00238411
hsa-miR-330	0.00219524
hsa-miR-132	0.0021792
hsa-miR-202	0.00216895
hsa-miR-605	0.00212198
hsa-miR-107	0.00182314
hsa-miR-1228	0.00178667
hsa-miR-205	0.00173752
hsa-miR-3681	0.0017361
hsa-miR-505	0.00144825
hsa-miR-23a	0.00143046
hsa-miR-383	0.00123161
hsa-miR-23b	0.00107958
hsa-miR-30d	0.00097014
hsa-miR-520a	0.00081222
hsa-miR-92b	0.000673652
hsa-miR-519d	0.000547576
hsa-miR-149	0.000465727
hsa-miR-20a	0.000417857
hsa-miR-193b	0.000417833
hsa-miR-186	0.000414935
hsa-miR-106b	0.000387782
hsa-miR-17	0.000374732
