# Supplementary material for: Discovering the ‘Dark matters’ in expression data of miRNA based on the miRNA-mRNA and miRNA-lncRNA networks
Source: BMC Bioinformatics. 2018 Oct 16;19:379. doi: 10.1186/s12859-018-2410-0 (PMC6192342; doi:10.1186/s12859-018-2410-0)
Supplement: Supplementary file 3 — The 2031 significantly changed miRNA-lncRNA interactions. (XLSX 65 kb) [file 12859_2018_2410_MOESM3_ESM.xlsx]

## Sheet: Sheet1
miRNA ID	LNCipedia ID of lncRNA	TCGA ID of lncRNA
hsa-mir-141	lnc-TRMT61B-1	ENSG00000226833.1
hsa-mir-200a	lnc-TRMT61B-1	ENSG00000226833.1
hsa-mir-141	lnc-PCSK9-4	ENSG00000234810.1
hsa-mir-200c	lnc-ARL6IP5-1	ENSG00000244513.2
hsa-mir-429	lnc-TRMT61B-1	ENSG00000226833.1
hsa-mir-141	GAS1RR	ENSG00000226237.1
hsa-mir-141	CARMN	ENSG00000253864.1
hsa-mir-141	LINC00032	ENSG00000231459.1
hsa-mir-378	lnc-METAP1-3	ENSG00000246090.2
hsa-mir-378	GAS1RR	ENSG00000226237.1
hsa-mir-141	LINC01152	ENSG00000256124.1
hsa-mir-141	lnc-ATL2-1	ENSG00000231367.1
hsa-mir-141	lnc-CLP1-3	ENSG00000254602.1
hsa-mir-200a	lnc-TRIM9-2	ENSG00000258942.1
hsa-mir-141	lnc-TRIM9-2	ENSG00000258942.1
hsa-mir-378	lnc-PCSK9-4	ENSG00000234810.1
hsa-mir-200a	lnc-CLP1-3	ENSG00000254602.1
hsa-mir-141	lnc-C5orf58-1	ENSG00000253647.1
hsa-mir-200a	GAS1RR	ENSG00000226237.1
hsa-mir-141	lnc-SNURF-1	ENSG00000257151.1
hsa-mir-200a	CARMN	ENSG00000253864.1
hsa-mir-141	lnc-ZFAT-1	ENSG00000259820.1
hsa-mir-141	EPB41L4A-AS1	ENSG00000224032.2
hsa-mir-200a	ACVR2B-AS1	ENSG00000229589.1
hsa-mir-429	lnc-C9orf146-2	ENSG00000225472.1
hsa-mir-200a	lnc-MON2-2	ENSG00000257354.1
hsa-mir-200a	lnc-ATL2-1	ENSG00000231367.1
hsa-mir-141	lnc-SLC16A8-2	ENSG00000222044.1
hsa-mir-141	lnc-MON2-2	ENSG00000257354.1
hsa-mir-200a	lnc-ARL4C-3	ENSG00000226542.1
hsa-mir-429	GAS1RR	ENSG00000226237.1
hsa-mir-141	lnc-PCSK9-4	ENSG00000233147.1
hsa-mir-378	lnc-ATL2-1	ENSG00000231367.1
hsa-mir-378	lnc-ALDH7A1-1	ENSG00000250602.1
hsa-mir-429	lnc-TPCN2-1	ENSG00000260895.1
hsa-mir-141	lnc-BCKDHB-2	ENSG00000260645.1
hsa-mir-141	lnc-LRRC3B-1	ENSG00000234165.1
hsa-mir-141	lnc-FAM101A-3	ENSG00000214650.2
hsa-mir-200a	lnc-C5orf58-1	ENSG00000253647.1
hsa-mir-378	SOX9-AS1	ENSG00000228639.2
hsa-mir-141	ACVR2B-AS1	ENSG00000229589.1
hsa-mir-141	lnc-STX16-2	ENSG00000254620.1
hsa-mir-141	lnc-CAST-3	ENSG00000250158.1
hsa-mir-200a	EPB41L4A-AS1	ENSG00000224032.2
hsa-mir-378	lnc-HEATR2-3	ENSG00000223855.1
hsa-mir-141	lnc-FOXL1-3	ENSG00000261175.1
hsa-mir-141	LINC00920	ENSG00000246898.1
hsa-mir-488	lnc-MTERFD3-1	ENSG00000260329.1
hsa-mir-200b	LINC00958	ENSG00000251381.2
hsa-mir-141	TP73-AS1	ENSG00000227372.6
hsa-mir-200c	LINC00958	ENSG00000251381.2
hsa-mir-200a	lnc-SLC16A8-2	ENSG00000222044.1
hsa-mir-200a	LINC00342	ENSG00000232931.1
hsa-mir-141	lnc-CYB5R2-3	ENSG00000251364.2
hsa-mir-200a	lnc-TMEM30B-1	ENSG00000247287.2
hsa-mir-200a	lnc-PCSK9-4	ENSG00000233147.1
hsa-mir-141	FAM13A-AS1	ENSG00000248019.2
hsa-mir-145	lnc-SMOC1-2	ENSG00000258422.1
hsa-mir-200b	lnc-ARL6IP5-1	ENSG00000244513.2
hsa-mir-200a	SEMA6A-AS1	ENSG00000248445.1
hsa-mir-144	SACS-AS1	ENSG00000229558.1
hsa-mir-141	LINC01266	ENSG00000224957.1
hsa-mir-378	PHEX-AS1	ENSG00000224204.1
hsa-mir-429	LINC01310	ENSG00000205632.2
hsa-mir-141	SEMA6A-AS1	ENSG00000248445.1
hsa-mir-144	CARMN	ENSG00000253864.1
hsa-mir-200a	FAM13A-AS1	ENSG00000248019.2
hsa-mir-144	CARMN	ENSG00000249669.3
hsa-mir-21	MESTIT1	ENSG00000259920.1
hsa-mir-200a	lnc-ZFAT-1	ENSG00000259820.1
hsa-mir-141	lnc-TMEM30B-1	ENSG00000247287.2
hsa-mir-144	lnc-METAP1-3	ENSG00000246090.2
hsa-mir-429	lnc-PCSK9-4	ENSG00000234810.1
hsa-mir-141	lnc-PSMC2-1	ENSG00000234715.1
hsa-mir-378	lnc-PABPC4-1	ENSG00000182109.3
hsa-mir-377	A2M-AS1	ENSG00000245105.1
hsa-mir-429	EPB41L4A-AS1	ENSG00000224032.2
hsa-mir-378	KCNAB1-AS1	ENSG00000242370.1
hsa-mir-200a	lnc-PCSK9-4	ENSG00000234810.1
hsa-mir-200a	lnc-TMEM132B-6	ENSG00000257061.1
hsa-mir-141	LINC00342	ENSG00000232931.1
hsa-mir-200a	SLC16A1-AS1	ENSG00000236066.1
hsa-mir-200a	LMO7-AS1	ENSG00000261105.1
hsa-mir-141	lnc-C6orf221-2	ENSG00000229852.2
hsa-mir-488	LINC01354	ENSG00000231768.1
hsa-mir-141	LINC00989	ENSG00000250334.1
hsa-mir-144	TMEM5-AS1	ENSG00000255850.1
hsa-mir-378	lnc-RNF5-1	ENSG00000225914.1
hsa-mir-335	lnc-CAPZA3-1	ENSG00000255648.1
hsa-mir-200a	lnc-CALM2-2	ENSG00000234690.2
hsa-mir-21	lnc-BBOX1-1	ENSG00000254862.1
hsa-mir-335	lnc-CALM2-2	ENSG00000234690.2
hsa-mir-141	MIR17HG	ENSG00000215417.6
hsa-mir-200a	lnc-CPO-5	ENSG00000229647.1
hsa-mir-200a	lnc-LRRD1-1	ENSG00000243107.1
hsa-mir-22	LIFR-AS1	ENSG00000244968.2
hsa-mir-200a	lnc-NDRG2-1	ENSG00000258471.1
hsa-mir-141	lnc-PPP2R4-1	ENSG00000204055.4
hsa-mir-1-2	lnc-TMEM30B-1	ENSG00000247287.2
hsa-mir-378	EPHA1-AS1	ENSG00000229153.1
hsa-mir-200a	lnc-BCKDHB-2	ENSG00000260645.1
hsa-mir-183	lnc-GAS2-2	ENSG00000255418.1
hsa-mir-141	XIST	ENSG00000229807.5
hsa-mir-141	lnc-CALM2-2	ENSG00000234690.2
hsa-mir-378	lnc-ZNF648-1	ENSG00000224810.1
hsa-mir-141	lnc-TCTE3-2	ENSG00000236173.1
hsa-mir-200a	lnc-CLIC4-1	ENSG00000229162.1
hsa-mir-141	lnc-NDRG2-1	ENSG00000258471.1
hsa-mir-200a	LINC01152	ENSG00000256124.1
hsa-mir-200a	lnc-C1orf86-1	ENSG00000182873.4
hsa-mir-182	lnc-UBLCP1-5	ENSG00000245812.2
hsa-mir-378	lnc-AGPAT5-1	ENSG00000245857.2
hsa-mir-378	lnc-TPTE2-1	ENSG00000229791.1
hsa-mir-22	lnc-METAP1-3	ENSG00000246090.2
hsa-mir-378	lnc-CYB5R2-3	ENSG00000251364.2
hsa-mir-200a	LINC01266	ENSG00000224957.1
hsa-mir-378	lnc-CYP11B2-1	ENSG00000247317.3
hsa-mir-196a-1	LINC00472	ENSG00000233237.2
hsa-mir-335	lnc-C6orf221-2	ENSG00000229852.2
hsa-mir-141	lnc-MNS1-1	ENSG00000261823.1
hsa-mir-429	LINC00885	ENSG00000224652.1
hsa-mir-383	lnc-TSHB-3	ENSG00000228035.1
hsa-mir-335	ACVR2B-AS1	ENSG00000229589.1
hsa-mir-141	SLC16A1-AS1	ENSG00000236066.1
hsa-mir-592	lnc-COX7C-2	ENSG00000250544.1
hsa-mir-206	lnc-AC011239.1.1-5	ENSG00000232451.1
hsa-mir-200a	lnc-CAST-3	ENSG00000250158.1
hsa-mir-488	lnc-TRBV25OR9-2-1	ENSG00000260947.1
hsa-mir-200a	lnc-FAM101A-3	ENSG00000214650.2
hsa-mir-141	lnc-KCNAB3-1	ENSG00000179859.7
hsa-mir-204	lnc-SERGEF-2	ENSG00000255335.1
hsa-mir-22	lnc-C6orf221-2	ENSG00000229852.2
hsa-mir-488	LINC00341	ENSG00000229645.4
hsa-mir-429	lnc-PABPC4-1	ENSG00000182109.3
hsa-mir-200a	lnc-C6orf221-2	ENSG00000229852.2
hsa-mir-375	LIFR-AS1	ENSG00000244968.2
hsa-mir-224	GAS1RR	ENSG00000226237.1
hsa-mir-145	LINC00341	ENSG00000229645.4
hsa-mir-378	lnc-C6orf221-2	ENSG00000229852.2
hsa-mir-429	lnc-TERF1-1	ENSG00000253636.1
hsa-mir-378	LINC01152	ENSG00000256124.1
hsa-mir-182	lnc-TRBV25OR9-2-1	ENSG00000260947.1
hsa-mir-429	LINC00958	ENSG00000251381.2
hsa-mir-200a	LINC00989	ENSG00000250334.1
hsa-mir-200a	MIR17HG	ENSG00000215417.6
hsa-mir-223	lnc-SNURF-1	ENSG00000257151.1
hsa-mir-141	lnc-IRF2BPL-1	ENSG00000258819.1
hsa-mir-203	lnc-TRMT61B-1	ENSG00000226833.1
hsa-mir-200a	lnc-IRF2BPL-1	ENSG00000258819.1
hsa-mir-200a	lnc-MNS1-1	ENSG00000261823.1
hsa-mir-203	lnc-METAP1-3	ENSG00000246090.2
hsa-mir-429	lnc-RP3-486B10.1.1-4	ENSG00000229931.1
hsa-mir-141	lnc-C1orf86-1	ENSG00000182873.4
hsa-mir-200a	LINC01524	ENSG00000234948.1
hsa-mir-375	lnc-FAM101A-3	ENSG00000214650.2
hsa-mir-378c	LINC01184	ENSG00000245937.3
hsa-mir-31	APTR	ENSG00000214293.4
hsa-mir-378	TMEM51-AS1	ENSG00000175147.7
hsa-mir-144	LIFR-AS1	ENSG00000244968.2
hsa-mir-378	IQCH-AS1	ENSG00000259673.1
hsa-mir-206	lnc-FPGS-1	ENSG00000225032.1
hsa-mir-203	SOX9-AS1	ENSG00000228639.2
hsa-mir-196a-1	SCAMP1-AS1	ENSG00000245556.2
hsa-mir-429	lnc-LPA-3	ENSG00000224371.1
hsa-mir-144	GAS1RR	ENSG00000226237.1
hsa-mir-196a-2	LINC00472	ENSG00000233237.2
hsa-mir-200c	LINC00894	ENSG00000235703.1
hsa-mir-141	lnc-CPO-5	ENSG00000229647.1
hsa-mir-141	lnc-CYP11B2-1	ENSG00000247317.3
hsa-mir-141	lnc-FAM27C-2	ENSG00000231527.1
hsa-mir-141	lnc-ANGEL1-1	ENSG00000258301.2
hsa-mir-200c	TP73-AS1	ENSG00000227372.6
hsa-mir-148a	CKMT2-AS1	ENSG00000247572.3
hsa-mir-22	lnc-SNURF-1	ENSG00000257151.1
hsa-mir-22	EPB41L4A-AS1	ENSG00000224032.2
hsa-mir-200a	lnc-CYP11B2-1	ENSG00000247317.3
hsa-mir-335	lnc-CD63-1	ENSG00000257509.1
hsa-mir-141	LINC00880	ENSG00000243629.1
hsa-mir-200a	GAS5	ENSG00000234741.3
hsa-mir-22	LINC01449	ENSG00000224017.1
hsa-mir-144	lnc-PUS7L-1	ENSG00000257742.1
hsa-mir-19b-1	lnc-WDR4-1	ENSG00000225218.1
hsa-mir-224	lnc-SLC6A12-11	ENSG00000256540.1
hsa-mir-429	lnc-RP11-1070N10.3.1-1	ENSG00000258630.1
hsa-mir-148a	EIF3J-AS1	ENSG00000179523.4
hsa-mir-200a	lnc-FOXL1-3	ENSG00000261175.1
hsa-mir-141	DUBR	ENSG00000243701.1
hsa-mir-193b	lnc-C6orf100-3	ENSG00000227214.2
hsa-mir-451	lnc-MTERFD3-1	ENSG00000260329.1
hsa-mir-22	TP73-AS1	ENSG00000227372.6
hsa-mir-200a	lnc-C7orf13-12	ENSG00000233878.1
hsa-mir-429	FAM66C	ENSG00000226711.2
hsa-mir-375	lnc-RNF39-4	ENSG00000204623.4
hsa-mir-144	lnc-RARS-2	ENSG00000254042.1
hsa-mir-429	lnc-APEX1-1	ENSG00000258515.1
hsa-mir-383	lnc-RP11-342M21.2.1-1	ENSG00000259347.1
hsa-mir-22	lnc-SLC16A8-2	ENSG00000222044.1
hsa-mir-429	lnc-TTLL7-2	ENSG00000233008.1
hsa-mir-141	lnc-GUSB-5	ENSG00000223473.1
hsa-mir-141	BDNF-AS	ENSG00000245573.3
hsa-mir-196a-2	SCAMP1-AS1	ENSG00000245556.2
hsa-mir-203	lnc-ALDH7A1-1	ENSG00000250602.1
hsa-mir-429	LINC01266	ENSG00000224957.1
hsa-mir-429	LINC00894	ENSG00000235703.1
hsa-mir-378c	GAS5	ENSG00000234741.3
hsa-mir-378	CASC2	ENSG00000177640.11
hsa-mir-378	DUBR	ENSG00000243701.1
hsa-mir-148a	TSIX	ENSG00000270641.1
hsa-mir-203	BDNF-AS	ENSG00000245573.3
hsa-mir-192	LINC01541	ENSG00000260676.1
hsa-mir-144	lnc-FAM75A4-3	ENSG00000204837.2
hsa-mir-22	lnc-FARSB-1	ENSG00000261428.1
hsa-mir-21	lnc-CNPY3-1	ENSG00000231113.2
hsa-mir-200a	lnc-TCTE3-2	ENSG00000236173.1
hsa-mir-378	lnc-ALB-1	ENSG00000250220.1
hsa-mir-144	LINC01537	ENSG00000227467.3
hsa-mir-429	lnc-PPP1R14D-1	ENSG00000261183.1
hsa-mir-378	lnc-SAMD14-3	ENSG00000246640.1
hsa-mir-132	lnc-POM121L4P-2	ENSG00000234252.1
hsa-mir-224	lnc-CAPZA3-1	ENSG00000255648.1
hsa-mir-205	lnc-NAV1-2	ENSG00000223396.2
hsa-mir-22	CCDC18-AS1	ENSG00000223745.3
hsa-mir-215	lnc-SRRD-1	ENSG00000261188.1
hsa-mir-378	lnc-IRX3-5	ENSG00000259725.1
hsa-mir-22	lnc-ATL2-1	ENSG00000231367.1
hsa-mir-30a	XIST	ENSG00000229807.5
hsa-mir-141	lnc-ZMYM6-1	ENSG00000241014.1
hsa-mir-451	lnc-AC009113.1-1	ENSG00000260279.1
hsa-mir-34c	TUG1	ENSG00000253352.4
hsa-mir-141	lnc-KLRD1-1	ENSG00000245648.1
hsa-mir-378	lnc-RUFY4-1	ENSG00000223923.1
hsa-mir-488	lnc-PTS-1	ENSG00000250303.2
hsa-mir-155	HCP5	ENSG00000206337.6
hsa-mir-148a	XIST	ENSG00000229807.5
hsa-mir-200a	lnc-KCNAB3-1	ENSG00000179859.7
hsa-mir-141	SNRK-AS1	ENSG00000234617.1
hsa-mir-144	DUBR	ENSG00000243701.1
hsa-mir-429	LINC00865	ENSG00000232229.1
hsa-mir-486	XIST	ENSG00000229807.5
hsa-mir-224	lnc-FARSB-1	ENSG00000261428.1
hsa-mir-200a	BDNF-AS	ENSG00000245573.3
hsa-mir-9-1	XIST	ENSG00000229807.5
hsa-mir-452	lnc-ARFIP1-5	ENSG00000268471.3
hsa-mir-203	LINC01500	ENSG00000258583.1
hsa-mir-224	lnc-NSUN6-1	ENSG00000240291.1
hsa-mir-200a	lnc-MLL3-1	ENSG00000229591.1
hsa-mir-224	lnc-CD40LG-2	ENSG00000234062.3
hsa-mir-144	FAM13A-AS1	ENSG00000248019.2
hsa-mir-141	LINC00894	ENSG00000235703.1
hsa-mir-200a	LINC00324	ENSG00000178977.3
hsa-mir-205	lnc-OTOL1-1	ENSG00000240567.1
hsa-mir-141	lnc-HNRNPU-1	ENSG00000188206.5
hsa-mir-378	THUMPD3-AS1	ENSG00000206573.4
hsa-mir-200a	lnc-ZMYM6-1	ENSG00000241014.1
hsa-mir-224	lnc-WDR4-5	ENSG00000225731.1
hsa-mir-335	lnc-MDM4-1	ENSG00000240710.1
hsa-mir-203	lnc-KRT81-3	ENSG00000257671.1
hsa-mir-378	lnc-FOXL1-3	ENSG00000261175.1
hsa-mir-429	TSIX	ENSG00000270641.1
hsa-mir-424	lnc-AGAP5-1	ENSG00000242288.6
hsa-mir-205	MIR22HG	ENSG00000186594.8
hsa-mir-144	lnc-SNURF-1	ENSG00000257151.1
hsa-mir-22	LINC00885	ENSG00000224652.1
hsa-mir-141	lnc-ETFA-1	ENSG00000259422.1
hsa-mir-203	lnc-PANK3-2	ENSG00000253978.1
hsa-mir-148a	lnc-TRIM26-2	ENSG00000231074.4
hsa-mir-200c	lnc-RP3-486B10.1.1-4	ENSG00000229931.1
hsa-mir-141	LINC00324	ENSG00000178977.3
hsa-mir-215	lnc-POLR1E-2	ENSG00000234160.1
hsa-mir-200a	lnc-CYB5R2-3	ENSG00000251364.2
hsa-mir-200a	MCPH1-AS1	ENSG00000249898.3
hsa-mir-9-2	LINC00665	ENSG00000232677.2
hsa-mir-141	LINC00939	ENSG00000249267.2
hsa-mir-215	lnc-FARSB-1	ENSG00000261428.1
hsa-mir-30a	lnc-IAH1-1	ENSG00000239300.1
hsa-mir-429	lnc-TMEM144-1	ENSG00000248429.1
hsa-mir-429	MATN1-AS1	ENSG00000186056.5
hsa-mir-200a	CRYM-AS1	ENSG00000189149.7
hsa-mir-224	TUG1	ENSG00000253352.4
hsa-mir-21	SNHG12	ENSG00000197989.9
hsa-mir-375	BDNF-AS	ENSG00000245573.3
hsa-mir-215	HCG23	ENSG00000228962.1
hsa-mir-31	lnc-PTS-1	ENSG00000250303.2
hsa-mir-141	lnc-TSHB-3	ENSG00000228035.1
hsa-mir-141	lnc-TFB1M-1	ENSG00000235381.1
hsa-mir-203	LINC00894	ENSG00000235703.1
hsa-mir-203	THUMPD3-AS1	ENSG00000206573.4
hsa-mir-31	lnc-ESR2-1	ENSG00000214770.2
hsa-mir-31	lnc-TRBV25OR9-2-1	ENSG00000260947.1
hsa-mir-141	LMO7-AS1	ENSG00000261105.1
hsa-mir-224	lnc-TRIM26-2	ENSG00000231074.4
hsa-mir-335	SNHG1	ENSG00000255717.2
hsa-mir-215	lnc-CXorf67-1	ENSG00000226530.1
hsa-mir-215	lnc-METAP1-3	ENSG00000246090.2
hsa-mir-200a	MIR646HG	ENSG00000228340.1
hsa-mir-31	lnc-ZNF648-1	ENSG00000224810.1
hsa-mir-205	lnc-AP3S1-4	ENSG00000249249.1
hsa-mir-215	lnc-MDM4-2	ENSG00000240219.1
hsa-mir-370	lnc-AC006050.2.1-1	ENSG00000259928.1
hsa-mir-342	GAS5	ENSG00000234741.3
hsa-mir-141	lnc-CRYBA4-7	ENSG00000233574.1
hsa-mir-429	lnc-CD40LG-2	ENSG00000234062.3
hsa-mir-132	CACNA1G-AS1	ENSG00000250107.1
hsa-mir-141	CASC2	ENSG00000177640.11
hsa-mir-212	lnc-ADAMTS16-5	ENSG00000231291.3
hsa-mir-144	lnc-PAICS-3	ENSG00000269921.1
hsa-mir-488	lnc-OR4F16-3	ENSG00000235373.1
hsa-mir-22	LINC00630	ENSG00000223546.2
hsa-mir-22	BOLA3-AS1	ENSG00000225439.2
hsa-mir-424	lnc-AGAP5-1	ENSG00000271816.1
hsa-mir-31	LINC01060	ENSG00000249378.1
hsa-mir-9-2	PCBP1-AS1	ENSG00000179818.9
hsa-mir-135a-1	XIST	ENSG00000229807.5
hsa-mir-16-2	lnc-ZMYM6-1	ENSG00000241014.1
hsa-mir-424	lnc-C6orf221-2	ENSG00000229852.2
hsa-mir-141	lnc-ACBD6-1	ENSG00000230124.2
hsa-mir-378	lnc-GPR98-5	ENSG00000250049.1
hsa-mir-215	LINC00894	ENSG00000235703.1
hsa-mir-451	IQCH-AS1	ENSG00000259673.1
hsa-mir-429	CASC15	ENSG00000261568.1
hsa-mir-144	lnc-IAH1-1	ENSG00000239300.1
hsa-mir-144	lnc-TMEM30B-1	ENSG00000247287.2
hsa-mir-31	lnc-NDRG2-1	ENSG00000258471.1
hsa-mir-196a-1	LINC00472	ENSG00000232295.3
hsa-mir-200a	lnc-RNF39-4	ENSG00000204623.4
hsa-mir-215	lnc-C6orf221-2	ENSG00000229852.2
hsa-mir-203	lnc-GLYATL2-2	ENSG00000255240.1
hsa-mir-145	lnc-FZD4-1	ENSG00000255471.1
hsa-mir-203	lnc-KIAA0284-2	ENSG00000258811.1
hsa-mir-488	lnc-ST7L-2	ENSG00000231246.1
hsa-mir-203	lnc-ATL2-1	ENSG00000231367.1
hsa-mir-132	lnc-ADAMTS16-5	ENSG00000231291.3
hsa-mir-141	SLC25A25-AS1	ENSG00000234771.2
hsa-mir-141	lnc-ADAM10-1	ENSG00000245975.2
hsa-mir-215	lnc-WNT8A-2	ENSG00000246323.2
hsa-mir-429	lnc-KRR1-3	ENSG00000258088.1
hsa-mir-141	TMEM147-AS1	ENSG00000236144.2
hsa-mir-141	lnc-PUS7L-1	ENSG00000257742.1
hsa-mir-141	lnc-KIAA1598-1	ENSG00000225302.1
hsa-mir-200a	lnc-CCRN4L-9	ENSG00000251632.1
hsa-mir-22	lnc-ADAM8-2	ENSG00000235245.1
hsa-mir-451	lnc-ETFA-1	ENSG00000259422.1
hsa-mir-22	lnc-AL353698.1-1	ENSG00000227486.1
hsa-mir-203	lnc-WNT8A-2	ENSG00000246323.2
hsa-mir-203	ZFHX4-AS1	ENSG00000253661.1
hsa-mir-144	lnc-CXorf67-1	ENSG00000226530.1
hsa-mir-215	GAS1RR	ENSG00000226237.1
hsa-mir-206	lnc-HTRA3-1	ENSG00000248986.1
hsa-mir-182	lnc-CEMP1-1	ENSG00000261140.1
hsa-mir-146a	MAP3K14-AS1	ENSG00000267278.1
hsa-mir-203	lnc-HEATR2-3	ENSG00000223855.1
hsa-mir-22	lnc-ARCN1-1	ENSG00000255176.1
hsa-mir-215	lnc-TESC-1	ENSG00000257279.1
hsa-mir-185	lnc-TFEC-2	ENSG00000243243.1
hsa-mir-378	lnc-SLC6A12-11	ENSG00000256540.1
hsa-mir-215	lnc-SLC6A12-3	ENSG00000249695.2
hsa-mir-375	CKMT2-AS1	ENSG00000247572.3
hsa-mir-141	lnc-RARS-2	ENSG00000254042.1
hsa-mir-224	LINC01267	ENSG00000251576.1
hsa-mir-451	lnc-MRPS9-3	ENSG00000226508.1
hsa-mir-31	lnc-MAP6-4	ENSG00000255507.1
hsa-mir-31	lnc-MYEOV-1	ENSG00000260877.1
hsa-mir-193b	lnc-VPREB1-1	ENSG00000234630.1
hsa-mir-223	lnc-C6orf221-2	ENSG00000229852.2
hsa-mir-136	LINC01340	ENSG00000250331.1
hsa-mir-362	LINC01355	ENSG00000261326.2
hsa-mir-424	lnc-ACBD6-1	ENSG00000230124.2
hsa-mir-22	TTC28-AS1	ENSG00000235954.2
hsa-mir-377	CACNA1G-AS1	ENSG00000250107.1
hsa-mir-144	LINC00996	ENSG00000242258.1
hsa-mir-141	lnc-TMEM144-1	ENSG00000248429.1
hsa-mir-200a	lnc-ETFA-1	ENSG00000259422.1
hsa-mir-155	lnc-KCNA3-3	ENSG00000259834.1
hsa-mir-20b	H19	ENSG00000130600.11
hsa-mir-21	lnc-NAV1-2	ENSG00000223396.2
hsa-mir-141	lnc-SIK1-5	ENSG00000237989.1
hsa-mir-488	FAM66C	ENSG00000226711.2
hsa-mir-758	CACNA1G-AS1	ENSG00000250107.1
hsa-mir-31	lnc-ADAM10-1	ENSG00000245975.2
hsa-mir-141	MIR646HG	ENSG00000228340.1
hsa-mir-185	lnc-CLEC18B-7	ENSG00000259972.1
hsa-mir-190	lnc-RNF39-4	ENSG00000204623.4
hsa-mir-215	lnc-CXCR7-1	ENSG00000232328.1
hsa-mir-542	lnc-FAM160A1-1	ENSG00000251603.1
hsa-mir-488	lnc-CHPF2-1	ENSG00000243018.1
hsa-mir-185	lnc-INPP4B-2	ENSG00000250326.1
hsa-mir-452	TUG1	ENSG00000253352.4
hsa-mir-30a	TSIX	ENSG00000270641.1
hsa-mir-22	lnc-CD40LG-2	ENSG00000234062.3
hsa-mir-424	KCNAB1-AS1	ENSG00000242370.1
hsa-mir-205	lnc-TMEM30B-1	ENSG00000247287.2
hsa-mir-193b	lnc-PTGR2-1	ENSG00000259065.1
hsa-mir-31	lnc-PNPLA3-1	ENSG00000261251.1
hsa-mir-146b	MAP3K14-AS1	ENSG00000267278.1
hsa-mir-203	SCAMP1-AS1	ENSG00000245556.2
hsa-mir-185	lnc-CA5A-2	ENSG00000205037.2
hsa-mir-429	THUMPD3-AS1	ENSG00000206573.4
hsa-mir-31	lnc-RNF5-1	ENSG00000225914.1
hsa-mir-429	lnc-TNK2-2	ENSG00000260261.1
hsa-mir-193b	CCNT2-AS1	ENSG00000224043.3
hsa-mir-429	LINC00341	ENSG00000229645.4
hsa-mir-203	UGDH-AS1	ENSG00000249348.1
hsa-mir-539	lnc-RASL11B-2	ENSG00000248115.1
hsa-mir-1-1	lnc-TRIM56-1	ENSG00000260336.1
hsa-mir-187	lnc-TSHB-3	ENSG00000228035.1
hsa-mir-424	lnc-AC110373.1-2	ENSG00000260091.1
hsa-mir-424	lnc-SEMA6A-2	ENSG00000250015.1
hsa-mir-375	lnc-BOD1-1	ENSG00000253686.1
hsa-mir-203	LINC00645	ENSG00000258548.1
hsa-mir-22	lnc-ALDH1A3-1	ENSG00000259604.1
hsa-mir-185	lnc-SLC6A12-3	ENSG00000249695.2
hsa-mir-141	lnc-TTLL7-2	ENSG00000233008.1
hsa-mir-141	LINC01500	ENSG00000258583.1
hsa-mir-203	lnc-MAPK6-7	ENSG00000259577.1
hsa-mir-335	lnc-C1orf200-2	ENSG00000235263.1
hsa-mir-185	lnc-AVEN-1	ENSG00000259287.1
hsa-mir-193a	MIR22HG	ENSG00000186594.8
hsa-mir-375	lnc-C6orf221-2	ENSG00000229852.2
hsa-mir-378	SNRK-AS1	ENSG00000234617.1
hsa-mir-488	lnc-RASL11B-2	ENSG00000248115.1
hsa-mir-22	SNHG1	ENSG00000255717.2
hsa-mir-144	FTX	ENSG00000271533.1
hsa-mir-205	lnc-ACBD6-1	ENSG00000230124.2
hsa-mir-141	lnc-CLIC4-1	ENSG00000229162.1
hsa-mir-488	ZEB1-AS1	ENSG00000237036.4
hsa-mir-542	TSIX	ENSG00000270641.1
hsa-mir-31	IQCH-AS1	ENSG00000259673.1
hsa-mir-378	lnc-TSPAN9-1	ENSG00000236908.2
hsa-mir-31	lnc-KCNA10-1	ENSG00000235407.1
hsa-mir-185	FTX	ENSG00000271430.1
hsa-mir-375	MEOX2-AS1	ENSG00000229108.1
hsa-mir-205	ZEB1-AS1	ENSG00000237036.4
hsa-mir-192	LINC01340	ENSG00000250331.1
hsa-mir-433	PCCA-AS1	ENSG00000234650.1
hsa-mir-130a	EPB41L4A-AS1	ENSG00000224032.2
hsa-mir-141	CYYR1-AS1	ENSG00000197934.4
hsa-mir-146b	EPB41L4A-AS1	ENSG00000224032.2
hsa-mir-181c	lnc-MST1P9-2	ENSG00000215908.5
hsa-mir-335	lnc-MDM4-2	ENSG00000240219.1
hsa-mir-200a	lnc-ESR2-1	ENSG00000214770.2
hsa-mir-21	lnc-UBLCP1-5	ENSG00000245812.2
hsa-mir-488	XIST	ENSG00000229807.5
hsa-mir-20b	CCDC18-AS1	ENSG00000223745.3
hsa-mir-196a-2	LINC00472	ENSG00000269966.1
hsa-mir-205	LINC01625	ENSG00000238099.1
hsa-mir-205	LINC01070	ENSG00000260102.1
hsa-mir-31	lnc-TNK2-2	ENSG00000260261.1
hsa-mir-424	lnc-NRGN-1	ENSG00000250073.2
hsa-mir-21	LIPE-AS1	ENSG00000213904.4
hsa-mir-224	LINC00989	ENSG00000250334.1
hsa-mir-375	lnc-TSSC1-4	ENSG00000228391.1
hsa-mir-31	LINC00894	ENSG00000235703.1
hsa-mir-378	lnc-BLID-3	ENSG00000246790.2
hsa-mir-424	lnc-METTL14-3	ENSG00000260404.2
hsa-mir-200a	lnc-FAM27C-2	ENSG00000231527.1
hsa-mir-22	lnc-METTL19-1	ENSG00000205959.3
hsa-mir-200a	lnc-ERGIC2-2	ENSG00000257176.1
hsa-mir-22	lnc-CLASP2-1	ENSG00000271324.1
hsa-mir-22	lnc-GPR89B-6	ENSG00000224481.1
hsa-mir-205	lnc-AC006050.2.1-1	ENSG00000259928.1
hsa-mir-335	lnc-PPP1R14D-1	ENSG00000261183.1
hsa-mir-335	COX10-AS1	ENSG00000236088.5
hsa-mir-422a	MEF2C-AS1	ENSG00000248309.1
hsa-mir-203	lnc-C1orf96-1	ENSG00000177788.5
hsa-mir-200c	lnc-ZNF582-3	ENSG00000267776.1
hsa-mir-203	B4GALT1-AS1	ENSG00000233554.1
hsa-mir-200a	lnc-TNFRSF10C-1	ENSG00000246130.1
hsa-mir-22	lnc-TESC-1	ENSG00000257279.1
hsa-mir-708	lnc-TSHB-3	ENSG00000228035.1
hsa-mir-130a	lnc-NPHP1-1	ENSG00000175701.6
hsa-mir-181c	lnc-CHMP7-1	ENSG00000246582.2
hsa-mir-551b	lnc-CLEC18B-7	ENSG00000259972.1
hsa-mir-193b	LIFR-AS1	ENSG00000244968.2
hsa-mir-215	lnc-TMEM30B-1	ENSG00000247287.2
hsa-mir-488	lnc-CXCR7-1	ENSG00000232328.1
hsa-mir-185	lnc-LRRD1-1	ENSG00000243107.1
hsa-mir-224	lnc-GAB2-1	ENSG00000251323.2
hsa-mir-215	LINC00342	ENSG00000232931.1
hsa-mir-205	lnc-ZIC1-5	ENSG00000239922.1
hsa-mir-22	lnc-PPIE-1	ENSG00000261798.1
hsa-mir-504	lnc-KCNAB3-1	ENSG00000179859.7
hsa-mir-424	XIST	ENSG00000229807.5
hsa-mir-200b	lnc-MORC2-2	ENSG00000269987.1
hsa-mir-22	lnc-WDR4-3	ENSG00000233754.1
hsa-mir-504	LINC01060	ENSG00000249378.1
hsa-mir-378	EWSAT1	ENSG00000259222.1
hsa-mir-133b	H19	ENSG00000130600.11
hsa-mir-31	CCDC18-AS1	ENSG00000223745.3
hsa-mir-215	ILF3-AS1	ENSG00000267100.1
hsa-mir-200b	ZEB1-AS1	ENSG00000237036.4
hsa-mir-22	TTLL10-AS1	ENSG00000205231.1
hsa-mir-429	lnc-C10orf12-1	ENSG00000231025.1
hsa-mir-451	lnc-TNFRSF11B-2	ENSG00000253972.1
hsa-mir-136	lnc-FAM27C-2	ENSG00000231527.1
hsa-mir-200a	lnc-KIAA1598-1	ENSG00000225302.1
hsa-mir-382	lnc-ADAMTS16-5	ENSG00000231291.3
hsa-mir-144	lnc-DTWD2-1	ENSG00000249494.1
hsa-mir-31	lnc-RP11-67H2.1.1-2	ENSG00000254262.1
hsa-mir-144	lnc-USP50-1	ENSG00000259298.1
hsa-mir-203	IQCH-AS1	ENSG00000259673.1
hsa-mir-375	lnc-PPP1R14D-1	ENSG00000261183.1
hsa-mir-424	EPB41L4A-AS1	ENSG00000224032.2
hsa-mir-132	lnc-F3-1	ENSG00000223675.1
hsa-mir-22	lnc-C7orf44-1	ENSG00000231638.1
hsa-mir-424	lnc-RBMX-1	ENSG00000232611.1
hsa-mir-205	lnc-KIAA0284-2	ENSG00000258811.1
hsa-mir-22	USP3-AS1	ENSG00000259248.1
hsa-mir-144	lnc-CWF19L2-1	ENSG00000261098.1
hsa-mir-488	lnc-ATPBD4-1	ENSG00000259336.1
hsa-mir-215	XIST	ENSG00000229807.5
hsa-mir-9-1	lnc-HNRNPU-1	ENSG00000188206.5
hsa-mir-488	lnc-AP3S1-4	ENSG00000249249.1
hsa-mir-205	lnc-C6orf221-2	ENSG00000229852.2
hsa-mir-22	APOA1-AS	ENSG00000235910.1
hsa-mir-205	lnc-LRRD1-1	ENSG00000243107.1
hsa-mir-363	lnc-SNX25-1	ENSG00000250410.1
hsa-mir-205	LINC00645	ENSG00000258548.1
hsa-mir-141	LINC01070	ENSG00000260102.1
hsa-mir-182	lnc-F13A1-2	ENSG00000261211.1
hsa-mir-451	lnc-FGFR1OP-2	ENSG00000261420.1
hsa-mir-488	GAS1RR	ENSG00000226237.1
hsa-mir-22	LRRC75A-AS1	ENSG00000175061.13
hsa-mir-215	lnc-C10orf12-1	ENSG00000231025.1
hsa-mir-22	MRPL23-AS1	ENSG00000226416.1
hsa-mir-429	lnc-AL353698.1-1	ENSG00000227486.1
hsa-mir-141	lnc-MLL3-1	ENSG00000229591.1
hsa-mir-429	ZFHX4-AS1	ENSG00000253661.1
hsa-mir-141	IQCH-AS1	ENSG00000259673.1
hsa-mir-15a	lnc-MON2-2	ENSG00000257354.1
hsa-mir-200c	ZEB1-AS1	ENSG00000237036.4
hsa-mir-144	lnc-MTIF2-1	ENSG00000203327.2
hsa-mir-181d	SNHG12	ENSG00000197989.9
hsa-mir-485	MEG3	ENSG00000214548.10
hsa-mir-141	lnc-BUD13-1	ENSG00000231611.1
hsa-mir-215	FAM13A-AS1	ENSG00000248019.2
hsa-mir-31	TMEM5-AS1	ENSG00000255850.1
hsa-mir-144	LINC01500	ENSG00000258583.1
hsa-mir-335	lnc-TMEM211-2	ENSG00000203280.3
hsa-mir-185	lnc-ARFIP1-5	ENSG00000268471.3
hsa-mir-31	lnc-MDM4-2	ENSG00000240219.1
hsa-mir-22	lnc-GJA10-4	ENSG00000260271.1
hsa-mir-185	lnc-GALNT3-1	ENSG00000229195.1
hsa-mir-378	UGDH-AS1	ENSG00000249348.1
hsa-mir-708	lnc-RP11-422N16.3.1-4	ENSG00000253434.1
hsa-mir-488	lnc-AC006050.2.1-1	ENSG00000259928.1
hsa-mir-144	UBL7-AS1	ENSG00000247240.3
hsa-mir-451	lnc-KIAA1609-1	ENSG00000261286.1
hsa-mir-758	lnc-RASL11B-2	ENSG00000248115.1
hsa-mir-377	lnc-AC006050.2.1-1	ENSG00000259928.1
hsa-mir-130a	CKMT2-AS1	ENSG00000247572.3
hsa-mir-22	ZNF337-AS1	ENSG00000213742.2
hsa-mir-15a	H19	ENSG00000130600.11
hsa-mir-146b	TSIX	ENSG00000270641.1
hsa-mir-22	lnc-ALB-1	ENSG00000250220.1
hsa-mir-424	lnc-RP11-625H11.1.1-3	ENSG00000259370.1
hsa-mir-224	lnc-PRAGMIN.1-1	ENSG00000253505.1
hsa-mir-375	lnc-ALDH7A1-1	ENSG00000250602.1
hsa-mir-378	USP3-AS1	ENSG00000259248.1
hsa-mir-181c	SNHG12	ENSG00000197989.9
hsa-mir-429	SNHG12	ENSG00000197989.9
hsa-mir-378	LINC00939	ENSG00000249267.2
hsa-mir-452	XIST	ENSG00000229807.5
hsa-mir-215	TSIX	ENSG00000270641.1
hsa-mir-203	lnc-NAV1-2	ENSG00000224536.1
hsa-mir-203	LIFR-AS1	ENSG00000244968.2
hsa-mir-378	LINC01537	ENSG00000227467.3
hsa-mir-200c	XIST	ENSG00000229807.5
hsa-mir-200b	lnc-LRRC31-1	ENSG00000239219.2
hsa-mir-203	USP3-AS1	ENSG00000259248.1
hsa-mir-378	UBA6-AS1	ENSG00000248049.2
hsa-mir-144	lnc-BCKDHB-1	ENSG00000233967.2
hsa-mir-185	SLC25A25-AS1	ENSG00000234771.2
hsa-mir-34c	lnc-DCTD-4	ENSG00000177822.3
hsa-mir-22	lnc-CTR9-2	ENSG00000246308.1
hsa-mir-22	lnc-MPEG1-2	ENSG00000245571.2
hsa-mir-375	UGDH-AS1	ENSG00000249348.1
hsa-mir-185	lnc-SLC6A12-11	ENSG00000256540.1
hsa-mir-31	lnc-ZNF727-6	ENSG00000226581.1
hsa-mir-141	THUMPD3-AS1	ENSG00000206573.4
hsa-mir-203	lnc-ACBD6-1	ENSG00000230124.2
hsa-mir-9-1	lnc-IL3RA-1	ENSG00000236871.2
hsa-mir-200a	lnc-CHMP7-2	ENSG00000253930.1
hsa-mir-141	lnc-ADAMTS12-2	ENSG00000249572.1
hsa-mir-136	lnc-SLC30A10-2	ENSG00000228536.1
hsa-mir-378	LINC01057	ENSG00000235565.1
hsa-mir-488	lnc-COL9A2-1	ENSG00000259943.1
hsa-mir-22	MIR646HG	ENSG00000228340.1
hsa-mir-31	LIFR-AS1	ENSG00000244968.2
hsa-mir-375	lnc-ALB-1	ENSG00000250220.1
hsa-mir-31	lnc-AC117834.1-3	ENSG00000253177.1
hsa-mir-200a	lnc-FGFR1OP-2	ENSG00000261420.1
hsa-mir-144	GAS5	ENSG00000234741.3
hsa-mir-22	lnc-CYP11B2-1	ENSG00000247317.3
hsa-mir-223	lnc-B4GALT7-1	ENSG00000247679.2
hsa-mir-22	SEMA6A-AS1	ENSG00000248445.1
hsa-mir-182	lnc-PPA2-2	ENSG00000250522.1
hsa-mir-22	lnc-ATP6V1B2-2	ENSG00000253775.1
hsa-mir-22	lnc-BOD1-1	ENSG00000254211.1
hsa-mir-378	lnc-TMEM132B-1	ENSG00000256276.1
hsa-mir-429	LINC00174	ENSG00000179406.6
hsa-mir-193b	lnc-METAP1-3	ENSG00000246090.2
hsa-mir-335	LINC00885	ENSG00000224652.1
hsa-mir-200b	MAPKAPK5-AS1	ENSG00000234608.3
hsa-mir-675	H19	ENSG00000130600.11
hsa-mir-375	lnc-HDAC9-2	ENSG00000232821.1
hsa-mir-200a	lnc-PSMC2-1	ENSG00000234715.1
hsa-mir-375	DUBR	ENSG00000243701.1
hsa-mir-375	lnc-BRF1-2	ENSG00000257270.1
hsa-mir-203	lnc-AVEN-1	ENSG00000259287.1
hsa-mir-149	LINC00115	ENSG00000223659.1
hsa-mir-224	lnc-NT5DC1-2	ENSG00000240050.1
hsa-mir-205	GAS5	ENSG00000234741.3
hsa-mir-133a-1	lnc-TRIM26-2	ENSG00000231074.4
hsa-mir-125a	TP73-AS1	ENSG00000227372.6
hsa-mir-22	H19	ENSG00000130600.11
hsa-mir-424	TSIX	ENSG00000270641.1
hsa-mir-22	lnc-DUSP1-4	ENSG00000204758.3
hsa-mir-429	lnc-FAM72B-5	ENSG00000227082.1
hsa-mir-203	lnc-TMEM30B-1	ENSG00000247287.2
hsa-mir-22	lnc-RHOJ-1	ENSG00000261242.1
hsa-mir-185	GAS1RR	ENSG00000226237.1
hsa-mir-224	lnc-TRIM9-2	ENSG00000258942.1
hsa-mir-9-2	lnc-TRIM26-2	ENSG00000231074.4
hsa-mir-335	lnc-KLHL31-2	ENSG00000227885.1
hsa-mir-144	lnc-TRMT11-2	ENSG00000231842.1
hsa-mir-424	lnc-TRRAP-1	ENSG00000242687.2
hsa-mir-375	LINC01500	ENSG00000258583.1
hsa-mir-144	lnc-ATP6V0E2-1	ENSG00000260555.1
hsa-mir-224	lnc-TMEM37-1	ENSG00000231013.1
hsa-mir-185	COX10-AS1	ENSG00000236088.5
hsa-mir-200a	LINC01070	ENSG00000260102.1
hsa-mir-215	lnc-ACBD6-1	ENSG00000230124.2
hsa-mir-383	lnc-GHR-1	ENSG00000260786.1
hsa-mir-185	lnc-STIM1-1	ENSG00000250404.1
hsa-mir-200a	XIST	ENSG00000229807.5
hsa-mir-429	XIST	ENSG00000229807.5
hsa-mir-9-1	lnc-TRIM26-2	ENSG00000231074.4
hsa-mir-9-1	TUG1	ENSG00000253352.4
hsa-mir-9-2	XIST	ENSG00000229807.5
hsa-mir-9-2	TUG1	ENSG00000253352.4
hsa-mir-146b	XIST	ENSG00000229807.5
hsa-mir-146b	lnc-TRIM26-2	ENSG00000231074.4
hsa-mir-196a-1	lnc-TRIM26-2	ENSG00000231074.4
hsa-mir-196a-2	lnc-TRIM26-2	ENSG00000231074.4
hsa-mir-15a	XIST	ENSG00000229807.5
hsa-mir-15a	lnc-TRIM26-2	ENSG00000231074.4
hsa-mir-193b	XIST	ENSG00000229807.5
hsa-mir-193b	lnc-TRIM26-2	ENSG00000231074.4
hsa-mir-144	XIST	ENSG00000229807.5
hsa-mir-144	TUG1	ENSG00000253352.4
hsa-mir-144	MIR17HG	ENSG00000215417.6
hsa-mir-133a-2	lnc-TRIM26-2	ENSG00000231074.4
hsa-mir-185	XIST	ENSG00000229807.5
hsa-mir-185	lnc-TRIM26-2	ENSG00000231074.4
hsa-mir-146a	lnc-TRIM26-2	ENSG00000231074.4
hsa-mir-133b	lnc-TRIM26-2	ENSG00000231074.4
hsa-mir-335	TUG1	ENSG00000253352.4
hsa-mir-31	XIST	ENSG00000229807.5
hsa-mir-31	TUG1	ENSG00000253352.4
hsa-mir-362	XIST	ENSG00000229807.5
hsa-mir-20b	XIST	ENSG00000229807.5
hsa-mir-542	TUG1	ENSG00000253352.4
hsa-mir-424	lnc-TRIM26-2	ENSG00000231074.4
hsa-mir-200b	LINC00894	ENSG00000235703.1
hsa-mir-200b	lnc-ZNF611-1	ENSG00000269825.1
hsa-mir-200b	lnc-ATL3-1	ENSG00000255651.2
hsa-mir-200b	XIST	ENSG00000229807.5
hsa-mir-200b	MATN1-AS1	ENSG00000186056.5
hsa-mir-200b	LINC00667	ENSG00000263753.2
hsa-mir-200a	CTBP1-AS2	ENSG00000196810.4
hsa-mir-200a	lnc-ZCCHC7-2	ENSG00000233137.2
hsa-mir-200a	lnc-ACAP3-1	ENSG00000240731.1
hsa-mir-200a	MZF1-AS1	ENSG00000267858.1
hsa-mir-200a	TP73-AS1	ENSG00000227372.6
hsa-mir-200a	TMEM147-AS1	ENSG00000236144.2
hsa-mir-429	MAPKAPK5-AS1	ENSG00000234608.3
hsa-mir-429	lnc-LRRC31-1	ENSG00000239219.2
hsa-mir-429	LINC00667	ENSG00000263753.2
hsa-mir-30e	SOX9-AS1	ENSG00000234899.5
hsa-mir-101-1	XIST	ENSG00000229807.5
hsa-mir-9-1	PCBP1-AS1	ENSG00000179818.9
hsa-mir-9-1	lnc-RNF39-4	ENSG00000204623.4
hsa-mir-9-1	LINC00665	ENSG00000232677.2
hsa-mir-9-2	lnc-RNF39-4	ENSG00000204623.4
hsa-mir-135b	RPARP-AS1	ENSG00000269609.1
hsa-mir-205	lnc-HNRNPU-1	ENSG00000188206.5
hsa-mir-205	lnc-DCTD-4	ENSG00000177822.3
hsa-mir-205	lnc-TRIM56-1	ENSG00000260336.1
hsa-mir-205	PSMA3-AS1	ENSG00000257621.3
hsa-mir-215	LINC01089	ENSG00000212694.4
hsa-mir-146b	lnc-AP3S1-4	ENSG00000249249.1
hsa-mir-34c	lnc-ATL3-1	ENSG00000255651.2
hsa-mir-200c	MAPKAPK5-AS1	ENSG00000234608.3
hsa-mir-200c	lnc-LRRC31-1	ENSG00000239219.2
hsa-mir-200c	MATN1-AS1	ENSG00000186056.5
hsa-mir-200c	lnc-ZNF611-1	ENSG00000269825.1
hsa-mir-200c	lnc-ATL3-1	ENSG00000255651.2
hsa-mir-141	CTBP1-AS2	ENSG00000196810.4
hsa-mir-141	lnc-ZCCHC7-2	ENSG00000233137.2
hsa-mir-141	lnc-ACAP3-1	ENSG00000240731.1
hsa-mir-141	SNHG15	ENSG00000232956.4
hsa-mir-141	MZF1-AS1	ENSG00000267858.1
hsa-mir-196a-1	XIST	ENSG00000229807.5
hsa-mir-196a-1	LINC00472	ENSG00000269966.1
hsa-mir-196a-1	TUG1	ENSG00000253352.4
hsa-mir-196a-2	XIST	ENSG00000229807.5
hsa-mir-196a-2	LINC00472	ENSG00000232295.3
hsa-mir-196a-2	TUG1	ENSG00000253352.4
hsa-mir-26a-1	lnc-ZNF595-1	ENSG00000250312.2
hsa-mir-135a-1	RPARP-AS1	ENSG00000269609.1
hsa-mir-16-1	lnc-ZMYM6-1	ENSG00000241014.1
hsa-mir-15a	EPB41L4A-AS1	ENSG00000224032.2
hsa-mir-15a	lnc-CYB5R2-3	ENSG00000251364.2
hsa-mir-15a	lnc-ZMYM6-1	ENSG00000241014.1
hsa-mir-15a	lnc-AGAP5-1	ENSG00000242288.6
hsa-mir-15a	lnc-AGAP5-1	ENSG00000271816.1
hsa-mir-15a	lnc-AGAP5-1	ENSG00000272140.2
hsa-mir-19b-1	SLC26A4-AS1	ENSG00000233705.2
hsa-mir-19b-1	lnc-AL669831.1-3	ENSG00000228794.4
hsa-mir-19b-1	lnc-TIGD2-2	ENSG00000271359.1
hsa-mir-193b	TP73-AS1	ENSG00000227372.6
hsa-mir-193b	lnc-PRDM13-2	ENSG00000228506.1
hsa-mir-193b	lnc-KIAA1598-1	ENSG00000225302.1
hsa-mir-22	lnc-METTL14-3	ENSG00000260404.2
hsa-mir-22	lnc-ACBD6-1	ENSG00000230124.2
hsa-mir-195	EPB41L4A-AS1	ENSG00000224032.2
hsa-mir-144	SDCBP2-AS1	ENSG00000229728.1
hsa-mir-144	lnc-SRRD-1	ENSG00000261188.1
hsa-mir-144	lnc-ZCCHC7-2	ENSG00000233137.2
hsa-mir-144	lnc-MALT1-2	ENSG00000267010.1
hsa-mir-144	PSMA3-AS1	ENSG00000257621.3
hsa-mir-193a	lnc-KIAA1598-1	ENSG00000225302.1
hsa-mir-133a-1	lnc-TMEM105-3	ENSG00000262877.3
hsa-mir-1-2	COX10-AS1	ENSG00000236088.5
hsa-mir-187	LINC00341	ENSG00000229645.4
hsa-mir-24-2	lnc-ZSCAN30-1	ENSG00000268573.1
hsa-mir-181c	lnc-HNRNPU-1	ENSG00000188206.5
hsa-mir-181c	lnc-ACBD6-1	ENSG00000230124.2
hsa-mir-181c	THUMPD3-AS1	ENSG00000206573.4
hsa-mir-181d	lnc-ACBD6-1	ENSG00000230124.2
hsa-mir-181d	lnc-MST1P9-2	ENSG00000215908.5
hsa-mir-155	MIR155HG	ENSG00000234883.2
hsa-mir-155	C1RL-AS1	ENSG00000205885.3
hsa-mir-155	NUP50-AS1	ENSG00000226328.2
hsa-mir-185	lnc-LRRC31-1	ENSG00000239219.2
hsa-mir-185	lnc-TRIM44-2	ENSG00000261355.1
hsa-mir-146a	lnc-AP3S1-4	ENSG00000249249.1
hsa-mir-146a	EPB41L4A-AS1	ENSG00000224032.2
hsa-mir-206	lnc-TMEM30B-1	ENSG00000247287.2
hsa-mir-148a	LINC00909	ENSG00000264247.1
hsa-mir-148a	lnc-TIGD2-2	ENSG00000271359.1
hsa-mir-148a	lnc-SMARCC2-1	ENSG00000258199.1
hsa-mir-148a	lnc-RPIA-2	ENSG00000234028.3
hsa-mir-148a	UBA6-AS1	ENSG00000248049.2
hsa-mir-335	lnc-C10orf12-1	ENSG00000231025.1
hsa-mir-486	lnc-METTL14-3	ENSG00000260404.2
hsa-mir-486	GNAS-AS1	ENSG00000268333.1
hsa-mir-31	lnc-HNRNPU-1	ENSG00000188206.5
hsa-mir-31	lnc-ATL3-1	ENSG00000255651.2
hsa-mir-31	LINC00174	ENSG00000179406.6
hsa-mir-31	MAGI2-AS3	ENSG00000234456.3
hsa-mir-204	CKMT2-AS1	ENSG00000247572.3
hsa-mir-362	CCDC18-AS1	ENSG00000223745.3
hsa-mir-362	lnc-LRRD1-1	ENSG00000243107.1
hsa-mir-362	lnc-TRIM44-2	ENSG00000261355.1
hsa-mir-362	lnc-KCNAB3-1	ENSG00000179859.7
hsa-mir-20b	lnc-UBLCP1-5	ENSG00000245812.2
hsa-mir-20b	SGMS1-AS1	ENSG00000226200.2
hsa-mir-20b	EPB41L4A-AS1	ENSG00000224032.2
hsa-mir-20b	CKMT2-AS1	ENSG00000247572.3
hsa-mir-20b	MAGI1-IT1	ENSG00000272610.1
hsa-mir-542	XIST	ENSG00000229807.5
hsa-mir-542	LIFR-AS1	ENSG00000244968.2
hsa-mir-542	CKMT2-AS1	ENSG00000247572.3
hsa-mir-424	lnc-RNF39-4	ENSG00000204623.4
hsa-mir-424	IQCH-AS1	ENSG00000259673.1
hsa-mir-424	PSMD5-AS1	ENSG00000226752.3
hsa-mir-424	lnc-FAM75A4-3	ENSG00000204837.2
hsa-mir-424	lnc-STIM1-1	ENSG00000250404.1
hsa-mir-424	lnc-AGAP5-1	ENSG00000272140.2
hsa-mir-424	UBA6-AS1	ENSG00000248049.2
hsa-mir-141	lnc-LRRD1-1	ENSG00000243107.1
hsa-mir-215	LINC01311	ENSG00000260924.2
hsa-mir-196a-2	lnc-SNX17-1	ENSG00000234072.1
hsa-mir-652	lnc-DCTD-4	ENSG00000177822.3
hsa-mir-148a	LINC00205	ENSG00000215447.3
hsa-mir-22	LINC00205	ENSG00000215447.3
hsa-let-7b	COX10-AS1	ENSG00000236088.5
hsa-mir-542	COX10-AS1	ENSG00000236088.5
hsa-mir-141	COX10-AS1	ENSG00000236088.5
hsa-mir-144	COX10-AS1	ENSG00000236088.5
hsa-mir-200a	COX10-AS1	ENSG00000236088.5
hsa-mir-22	lnc-MST1P9-2	ENSG00000215908.5
hsa-mir-205	lnc-MST1P9-2	ENSG00000215908.5
hsa-mir-31	lnc-MST1P9-2	ENSG00000215908.5
hsa-mir-31	lnc-MGAT1-1	ENSG00000260841.1
hsa-mir-31	LINC01184	ENSG00000245937.3
hsa-mir-452	LINC01184	ENSG00000245937.3
hsa-mir-9-1	CKMT2-AS1	ENSG00000247572.3
hsa-mir-141	lnc-NPTX1-2	ENSG00000263069.1
hsa-mir-200a	lnc-NPTX1-2	ENSG00000263069.1
hsa-mir-196a-2	EPB41L4A-AS1	ENSG00000224032.2
hsa-mir-185	FTX	ENSG00000230590.3
hsa-mir-205	FTX	ENSG00000230590.3
hsa-mir-15a	FTX	ENSG00000271430.1
hsa-mir-144	FTX	ENSG00000271430.1
hsa-mir-205	FTX	ENSG00000271430.1
hsa-mir-31	FTX	ENSG00000271430.1
hsa-mir-15a	FTX	ENSG00000271533.1
hsa-mir-185	FTX	ENSG00000271533.1
hsa-mir-205	FTX	ENSG00000271533.1
hsa-mir-31	FTX	ENSG00000271533.1
hsa-mir-452	GAS5	ENSG00000234741.3
hsa-mir-22	GAS5	ENSG00000234741.3
hsa-mir-224	GAS5	ENSG00000234741.3
hsa-mir-141	H19	ENSG00000130600.11
hsa-mir-185	H19	ENSG00000130600.11
hsa-mir-200a	H19	ENSG00000130600.11
hsa-mir-100	H19	ENSG00000130600.11
hsa-mir-1-1	H19	ENSG00000130600.11
hsa-mir-206	H19	ENSG00000130600.11
hsa-mir-130a	lnc-TRIM26-2	ENSG00000231074.4
hsa-mir-141	lnc-TRIM26-2	ENSG00000231074.4
hsa-mir-181c	lnc-TRIM26-2	ENSG00000231074.4
hsa-mir-181d	lnc-TRIM26-2	ENSG00000231074.4
hsa-mir-200a	lnc-TRIM26-2	ENSG00000231074.4
hsa-mir-375	lnc-TRIM26-2	ENSG00000231074.4
hsa-mir-452	lnc-TRIM26-2	ENSG00000231074.4
hsa-mir-488	lnc-TRIM26-2	ENSG00000231074.4
hsa-mir-542	lnc-TRIM26-2	ENSG00000231074.4
hsa-mir-551b	lnc-TRIM26-2	ENSG00000231074.4
hsa-mir-125a	lnc-TRIM26-2	ENSG00000231074.4
hsa-mir-135b	lnc-TRIM26-2	ENSG00000231074.4
hsa-mir-144	lnc-TRIM26-2	ENSG00000231074.4
hsa-mir-19b-1	lnc-TRIM26-2	ENSG00000231074.4
hsa-mir-22	lnc-TRIM26-2	ENSG00000231074.4
hsa-mir-375	lnc-HNRNPU-1	ENSG00000188206.5
hsa-mir-200c	MIR17HG	ENSG00000215417.6
hsa-mir-30e	MIR22HG	ENSG00000186594.8
hsa-mir-22	MIR22HG	ENSG00000186594.8
hsa-mir-185	MIR22HG	ENSG00000186594.8
hsa-mir-193b	MIR22HG	ENSG00000186594.8
hsa-mir-196a-2	MIR22HG	ENSG00000186594.8
hsa-mir-424	MIR22HG	ENSG00000186594.8
hsa-mir-1-1	lnc-CISD2-1	ENSG00000246560.2
hsa-mir-181d	lnc-CHMP7-1	ENSG00000246582.2
hsa-mir-185	lnc-FAM186B-1	ENSG00000257964.1
hsa-mir-378c	lnc-KLHL11-1	ENSG00000259623.1
hsa-mir-452	lnc-KLHL25-1	ENSG00000259407.1
hsa-mir-135b	lnc-FAM160A1-1	ENSG00000251603.1
hsa-mir-224	lnc-CDK2AP1-1	ENSG00000235423.4
hsa-let-7a-2	lnc-SGSH-1	ENSG00000262580.1
hsa-let-7b	lnc-SGSH-1	ENSG00000262580.1
hsa-mir-135b	lnc-SGSH-1	ENSG00000262580.1
hsa-mir-148a	lnc-SGSH-1	ENSG00000262580.1
hsa-mir-130a	LINC01278	ENSG00000235437.3
hsa-mir-135b	lnc-LRRC31-1	ENSG00000239219.2
hsa-mir-206	lnc-TRIM56-1	ENSG00000260336.1
hsa-mir-141	lnc-ZNF843-2	ENSG00000261474.1
hsa-mir-200a	lnc-ZNF843-2	ENSG00000261474.1
hsa-mir-378c	MMP25-AS1	ENSG00000261971.2
hsa-mir-200b	lnc-RP3-486B10.1.1-4	ENSG00000229931.1
hsa-mir-148a	lnc-RP3-486B10.1.1-4	ENSG00000229931.1
hsa-mir-16-1	lnc-MON2-2	ENSG00000257354.1
hsa-mir-185	lnc-MON2-2	ENSG00000257354.1
hsa-mir-135b	lnc-NFATC3-1	ENSG00000261864.1
hsa-mir-200c	lnc-NFATC3-1	ENSG00000261864.1
hsa-mir-200b	lnc-CWF19L2-1	ENSG00000261098.1
hsa-mir-200c	lnc-CWF19L2-1	ENSG00000261098.1
hsa-mir-185	CCDC18-AS1	ENSG00000223745.3
hsa-mir-195	CCDC18-AS1	ENSG00000223745.3
hsa-mir-452	CCDC18-AS1	ENSG00000223745.3
hsa-mir-130a	CCDC18-AS1	ENSG00000223745.3
hsa-mir-144	CCDC18-AS1	ENSG00000223745.3
hsa-mir-375	CCDC18-AS1	ENSG00000223745.3
hsa-mir-500b	CCDC18-AS1	ENSG00000223745.3
hsa-mir-224	LINC01355	ENSG00000261326.2
hsa-mir-148a	lnc-ACBD6-1	ENSG00000230124.2
hsa-mir-362	lnc-ACBD6-1	ENSG00000230124.2
hsa-mir-503	lnc-ACBD6-1	ENSG00000230124.2
hsa-mir-30e	SNHG1	ENSG00000255717.2
hsa-mir-135b	SNHG1	ENSG00000255717.2
hsa-mir-141	SNHG1	ENSG00000255717.2
hsa-mir-146a	SNHG1	ENSG00000255717.2
hsa-mir-181c	SNHG1	ENSG00000255717.2
hsa-mir-19b-1	SNHG1	ENSG00000255717.2
hsa-mir-31	SNHG1	ENSG00000255717.2
hsa-mir-148a	SNHG1	ENSG00000255717.2
hsa-mir-200a	SNHG1	ENSG00000255717.2
hsa-mir-141	SNHG12	ENSG00000197989.9
hsa-mir-146a	SNHG12	ENSG00000197989.9
hsa-mir-146b	SNHG12	ENSG00000197989.9
hsa-mir-200a	SNHG12	ENSG00000197989.9
hsa-mir-200b	SNHG12	ENSG00000197989.9
hsa-mir-200c	SNHG12	ENSG00000197989.9
hsa-mir-144	SNHG6	ENSG00000254341.1
hsa-mir-148a	SNHG7	ENSG00000233016.2
hsa-let-7a-2	TP73-AS1	ENSG00000227372.6
hsa-mir-200b	TP73-AS1	ENSG00000227372.6
hsa-mir-185	TP73-AS1	ENSG00000227372.6
hsa-let-7b	TPT1-AS1	ENSG00000170919.11
hsa-mir-15a	TTC28-AS1	ENSG00000235954.2
hsa-mir-193a	TTC28-AS1	ENSG00000235954.2
hsa-mir-362	TTC28-AS1	ENSG00000235954.2
hsa-mir-141	TUG1	ENSG00000253352.4
hsa-mir-193b	TUG1	ENSG00000253352.4
hsa-mir-200a	TUG1	ENSG00000253352.4
hsa-mir-429	TUG1	ENSG00000253352.4
hsa-mir-135b	TUG1	ENSG00000253352.4
hsa-mir-148a	TUG1	ENSG00000253352.4
hsa-mir-181c	TUG1	ENSG00000253352.4
hsa-mir-205	TUG1	ENSG00000253352.4
hsa-mir-215	TUG1	ENSG00000253352.4
hsa-mir-22	TUG1	ENSG00000253352.4
hsa-mir-375	TUG1	ENSG00000253352.4
hsa-mir-589	XIST	ENSG00000229807.5
hsa-mir-133b	XIST	ENSG00000229807.5
hsa-mir-205	XIST	ENSG00000229807.5
hsa-mir-224	XIST	ENSG00000229807.5
hsa-mir-652	XIST	ENSG00000229807.5
hsa-mir-223	XIST	ENSG00000229807.5
hsa-mir-22	XIST	ENSG00000229807.5
hsa-mir-375	XIST	ENSG00000229807.5
hsa-let-7a-2	lnc-CYB5R2-3	ENSG00000251364.2
hsa-mir-22	lnc-CLEC18B-7	ENSG00000259972.1
hsa-mir-488	lnc-CLEC18B-7	ENSG00000259972.1
hsa-mir-424	lnc-CLEC18B-7	ENSG00000259972.1
hsa-mir-342	SNHG15	ENSG00000232956.4
hsa-mir-141	UBR5-AS1	ENSG00000246263.2
hsa-let-7b	TSIX	ENSG00000270641.1
hsa-mir-135b	TSIX	ENSG00000270641.1
hsa-mir-144	TSIX	ENSG00000270641.1
hsa-mir-185	TSIX	ENSG00000270641.1
hsa-mir-196a-2	TSIX	ENSG00000270641.1
hsa-mir-205	TSIX	ENSG00000270641.1
hsa-mir-20b	TSIX	ENSG00000270641.1
hsa-mir-224	TSIX	ENSG00000270641.1
hsa-mir-452	TSIX	ENSG00000270641.1
hsa-mir-551b	TSIX	ENSG00000270641.1
hsa-mir-9-1	TSIX	ENSG00000270641.1
hsa-mir-133b	TSIX	ENSG00000270641.1
hsa-mir-200b	TSIX	ENSG00000270641.1
hsa-mir-200c	TSIX	ENSG00000270641.1
hsa-mir-362	TSIX	ENSG00000270641.1
hsa-mir-375	TSIX	ENSG00000270641.1
hsa-mir-488	TSIX	ENSG00000270641.1
hsa-mir-196a-2	LINC00894	ENSG00000235703.1
hsa-let-7b	EMX2OS	ENSG00000229847.4
hsa-mir-129-2	EMX2OS	ENSG00000229847.4
hsa-let-7b	lnc-BOD1-1	ENSG00000253686.1
hsa-mir-375	ZNF30-AS1	ENSG00000270876.1
hsa-mir-193b	ZFAS1	ENSG00000177410.8
hsa-mir-144	ZFAS1	ENSG00000177410.8
hsa-mir-22	ZFAS1	ENSG00000177410.8
hsa-mir-193a	lnc-ZNF506-2	ENSG00000267565.1
hsa-mir-452	lnc-DUXA-3	ENSG00000267871.1
hsa-mir-452	FZD10-AS1	ENSG00000250208.2
hsa-mir-144	lnc-KCNJ14-1	ENSG00000269423.1
hsa-mir-223	ENTPD1-AS1	ENSG00000226688.2
hsa-mir-708	lnc-CALCOCO2-8	ENSG00000230148.4
hsa-mir-144	lnc-MARCH4-2	ENSG00000232485.2
hsa-mir-146a	MATN1-AS1	ENSG00000186056.5
hsa-mir-215	MATN1-AS1	ENSG00000186056.5
hsa-mir-363	lnc-AF131215.2.1-1	ENSG00000269918.1
hsa-mir-196a-2	LINC00958	ENSG00000251381.2
hsa-mir-31	LINC00958	ENSG00000251381.2
hsa-mir-9-1	LINC00958	ENSG00000251381.2
hsa-mir-223	lnc-IRF2-3	ENSG00000180712.3
hsa-mir-224	lnc-IRF2-3	ENSG00000180712.3
hsa-mir-30e	lnc-IRF2-3	ENSG00000180712.3
hsa-mir-452	lnc-IRF2-3	ENSG00000180712.3
hsa-mir-212	CACNA1G-AS1	ENSG00000250107.1
hsa-mir-196a-2	lnc-RNASET2-1	ENSG00000227598.1
hsa-mir-205	lnc-RNASET2-1	ENSG00000227598.1
hsa-mir-125a	lnc-DBX1-6	ENSG00000270607.1
hsa-mir-488	lnc-DBX1-6	ENSG00000270607.1
hsa-mir-125a	lnc-CTU2-5	ENSG00000182376.2
hsa-mir-452	MAPKAPK5-AS1	ENSG00000234608.3
hsa-mir-133b	EIF3J-AS1	ENSG00000179523.4
hsa-mir-181c	EIF3J-AS1	ENSG00000179523.4
hsa-mir-205	EIF3J-AS1	ENSG00000179523.4
hsa-mir-9-1	EIF3J-AS1	ENSG00000179523.4
hsa-mir-362	EIF3J-AS1	ENSG00000179523.4
hsa-mir-362	LINC00909	ENSG00000264247.1
hsa-mir-224	LINC00909	ENSG00000264247.1
hsa-mir-133b	lnc-FAM71E1-2	ENSG00000268518.1
hsa-mir-9-1	lnc-PAPOLG-1	ENSG00000233953.1
hsa-mir-139	NRAV	ENSG00000248008.2
hsa-mir-378c	NRAV	ENSG00000248008.2
hsa-mir-9-1	lnc-ZNF708-2	ENSG00000268119.1
hsa-mir-144	lnc-JMJD7-PLA2G4B-2	ENSG00000174171.4
hsa-mir-141	lnc-CHMP7-2	ENSG00000253930.1
hsa-mir-224	lnc-BRCA1-3	ENSG00000267002.1
hsa-mir-429	ZEB1-AS1	ENSG00000237036.4
hsa-mir-215	ZEB1-AS1	ENSG00000237036.4
hsa-mir-141	lnc-ANKRD30A-1	ENSG00000234918.1
hsa-mir-141	LINC00645	ENSG00000258548.1
hsa-mir-200a	LINC00645	ENSG00000258548.1
hsa-mir-141	lnc-ING5-1	ENSG00000228989.1
hsa-mir-200a	lnc-ING5-1	ENSG00000228989.1
hsa-mir-144	lnc-FAM164A-1	ENSG00000261618.1
hsa-mir-145	lnc-ZDHHC13-1	ENSG00000255308.1
hsa-mir-22	lnc-LRRK1-3	ENSG00000259172.1
hsa-mir-146a	MIR3142HG	ENSG00000253522.2
hsa-mir-141	ASH1L-AS1	ENSG00000235919.3
hsa-mir-200a	ASH1L-AS1	ENSG00000235919.3
hsa-mir-450a-1	LIMD1-AS1	ENSG00000230530.1
hsa-mir-200c	lnc-MORC2-2	ENSG00000269987.1
hsa-mir-429	lnc-MORC2-2	ENSG00000269987.1
hsa-mir-223	lnc-KLHL31-2	ENSG00000227885.1
hsa-mir-205	lnc-KLHL31-2	ENSG00000227885.1
hsa-mir-217	lnc-ADAM11-2	ENSG00000267505.1
hsa-mir-144	lnc-AP2B1-2	ENSG00000267321.1
hsa-mir-335	LINC01237	ENSG00000233806.3
hsa-mir-22	VPS9D1-AS1	ENSG00000261373.1
hsa-mir-132	lnc-GPR157-1	ENSG00000228526.2
hsa-mir-22	lnc-NDRG2-1	ENSG00000258471.1
hsa-mir-205	C20orf166-AS1	ENSG00000174403.11
hsa-mir-144	TMEM51-AS1	ENSG00000175147.7
hsa-mir-206	lnc-NPHP1-1	ENSG00000175701.6
hsa-mir-203	LINC01106	ENSG00000175772.10
hsa-mir-31	EIF3J-AS1	ENSG00000179523.4
hsa-mir-375	EIF3J-AS1	ENSG00000179523.4
hsa-mir-144	lnc-KCNAB3-1	ENSG00000179859.7
hsa-mir-203	lnc-KCNAB3-1	ENSG00000179859.7
hsa-mir-144	lnc-IRF2-3	ENSG00000180712.3
hsa-mir-203	lnc-IRF2-3	ENSG00000180712.3
hsa-mir-429	lnc-MAPK15-2	ENSG00000181097.5
hsa-mir-424	lnc-PABPC4-1	ENSG00000182109.3
hsa-mir-193b	lnc-PABPC4-1	ENSG00000182109.3
hsa-mir-22	lnc-PABPC4-1	ENSG00000182109.3
hsa-mir-31	lnc-CTU2-5	ENSG00000182376.2
hsa-mir-141	lnc-FBXO28-1	ENSG00000185495.6
hsa-mir-200a	lnc-FBXO28-1	ENSG00000185495.6
hsa-mir-193b	lnc-FBXO28-1	ENSG00000185495.6
hsa-mir-203	lnc-FBXO28-1	ENSG00000185495.6
hsa-mir-200a	LINC00643	ENSG00000186369.5
hsa-mir-429	LINC00643	ENSG00000186369.5
hsa-mir-22	lnc-SLC29A4-1	ENSG00000188365.3
hsa-mir-152	lnc-CYS1-3	ENSG00000188525.3
hsa-mir-22	lnc-CYS1-3	ENSG00000188525.3
hsa-mir-141	CRYM-AS1	ENSG00000189149.7
hsa-mir-424	CRYM-AS1	ENSG00000189149.7
hsa-mir-183	lnc-TSHZ2-1	ENSG00000197670.5
hsa-mir-203	LINC01123	ENSG00000204588.5
hsa-mir-22	LINC01123	ENSG00000204588.5
hsa-mir-141	lnc-RNF39-4	ENSG00000204623.4
hsa-mir-144	lnc-RNF39-4	ENSG00000204623.4
hsa-mir-215	lnc-RNF39-4	ENSG00000204623.4
hsa-mir-429	lnc-RNF39-4	ENSG00000204623.4
hsa-mir-203	lnc-RNF39-4	ENSG00000204623.4
hsa-mir-22	lnc-RNF39-4	ENSG00000204623.4
hsa-mir-31	lnc-RNF39-4	ENSG00000204623.4
hsa-mir-141	lnc-DUSP1-4	ENSG00000204758.3
hsa-mir-200a	lnc-DUSP1-4	ENSG00000204758.3
hsa-mir-429	lnc-FAM27E1.1-5	ENSG00000204802.3
hsa-mir-31	lnc-FAM27E1.1-5	ENSG00000204802.3
hsa-mir-22	lnc-FAM75A4-3	ENSG00000204837.2
hsa-mir-31	lnc-FAM75A4-3	ENSG00000204837.2
hsa-mir-375	lnc-FAM75A4-3	ENSG00000204837.2
hsa-mir-22	lnc-CA5A-2	ENSG00000205037.2
hsa-mir-107	lnc-CA5A-2	ENSG00000205037.2
hsa-mir-375	lnc-CA5A-2	ENSG00000205037.2
hsa-mir-215	C1RL-AS1	ENSG00000205885.3
hsa-mir-21	C1RL-AS1	ENSG00000205885.3
hsa-mir-22	C1RL-AS1	ENSG00000205885.3
hsa-mir-31	C1RL-AS1	ENSG00000205885.3
hsa-mir-424	lnc-METTL19-1	ENSG00000205959.3
hsa-mir-429	lnc-GABRA5-10	ENSG00000206187.3
hsa-mir-22	lnc-GABRA5-10	ENSG00000206187.3
hsa-mir-31	lnc-GABRA5-10	ENSG00000206187.3
hsa-mir-200a	THUMPD3-AS1	ENSG00000206573.4
hsa-mir-144	THUMPD3-AS1	ENSG00000206573.4
hsa-mir-31	THUMPD3-AS1	ENSG00000206573.4
hsa-mir-193b	LINC01089	ENSG00000212694.4
hsa-mir-22	LINC01089	ENSG00000212694.4
hsa-mir-141	lnc-ESR2-1	ENSG00000214770.2
hsa-mir-22	lnc-ESR2-1	ENSG00000214770.2
hsa-mir-22	CD27-AS1	ENSG00000215039.2
hsa-mir-22	lnc-ZNF705A-2	ENSG00000215241.3
hsa-mir-193b	lnc-SLC16A8-2	ENSG00000222044.1
hsa-mir-182	lnc-NAV1-2	ENSG00000223396.2
hsa-mir-183	lnc-NAV1-2	ENSG00000223396.2
hsa-mir-429	lnc-NAV1-2	ENSG00000223396.2
hsa-mir-200a	lnc-GUSB-5	ENSG00000223473.1
hsa-mir-144	LINC00630	ENSG00000223546.2
hsa-mir-203	LINC00630	ENSG00000223546.2
hsa-mir-22	LINC01044	ENSG00000223626.1
hsa-mir-383	LINC01044	ENSG00000223626.1
hsa-mir-211	lnc-NFX1-1	ENSG00000223678.1
hsa-mir-144	lnc-MUC20-2	ENSG00000223711.1
hsa-mir-200a	ENTPD3-AS1	ENSG00000223797.1
hsa-mir-205	ENTPD3-AS1	ENSG00000223797.1
hsa-mir-150	MIR4432HG	ENSG00000223929.1
hsa-mir-31	LINC01449	ENSG00000224017.1
hsa-mir-205	EPB41L4A-AS1	ENSG00000224032.2
hsa-mir-383	EPB41L4A-AS1	ENSG00000224032.2
hsa-mir-429	CCNT2-AS1	ENSG00000224043.3
hsa-mir-141	lnc-PPIL2-1	ENSG00000224086.3
hsa-mir-200a	lnc-PPIL2-1	ENSG00000224086.3
hsa-mir-215	lnc-PPIL2-1	ENSG00000224086.3
hsa-mir-22	lnc-PPIL2-1	ENSG00000224086.3
hsa-mir-375	lnc-PPIL2-1	ENSG00000224086.3
hsa-mir-217	INHBA-AS1	ENSG00000224116.2
hsa-mir-22	DNAJC27-AS1	ENSG00000224165.1
hsa-mir-182	lnc-AIFM2-1	ENSG00000224222.1
hsa-mir-363	lnc-CLCNKB-2	ENSG00000224621.1
hsa-mir-193b	LINC00885	ENSG00000224652.1
hsa-mir-22	PCOLCE-AS1	ENSG00000224729.4
hsa-mir-182	POT1-AS1	ENSG00000224897.2
hsa-mir-183	POT1-AS1	ENSG00000224897.2
hsa-mir-22	LINC01266	ENSG00000224957.1
hsa-mir-429	lnc-HES4-1	ENSG00000224969.1
hsa-mir-22	lnc-B3GALT5-1	ENSG00000225330.1
hsa-mir-31	TMEM246-AS1	ENSG00000225376.1
hsa-mir-22	lnc-C7orf63-1	ENSG00000225498.1
hsa-mir-22	lnc-NSUN6-1	ENSG00000225527.1
hsa-mir-205	MTOR-AS1	ENSG00000225602.1
hsa-mir-203	PGM5P3-AS1	ENSG00000225655.1
hsa-mir-203	lnc-WDR4-5	ENSG00000225731.1
hsa-mir-155	lnc-CRYBA4-1	ENSG00000225783.2
hsa-mir-193b	lnc-RNF5-1	ENSG00000225914.1
hsa-mir-375	KCNIP2-AS1	ENSG00000226009.1
hsa-mir-193b	lnc-NECAP2-1	ENSG00000226029.1
hsa-mir-31	lnc-NECAP2-1	ENSG00000226029.1
hsa-mir-31	FGF13-AS1	ENSG00000226031.1
hsa-mir-424	lnc-SOX9-1	ENSG00000226101.1
hsa-mir-22	lnc-SOX9-1	ENSG00000226101.1
hsa-mir-338	lnc-SOX9-1	ENSG00000226101.1
hsa-mir-22	GAS1RR	ENSG00000226237.1
hsa-mir-203	lnc-MREG-1	ENSG00000226276.1
hsa-mir-193b	MRPL23-AS1	ENSG00000226416.1
hsa-mir-424	lnc-JMJD1C-3	ENSG00000226426.1
hsa-mir-182	ADIPOQ-AS1	ENSG00000226482.1
hsa-mir-31	ADIPOQ-AS1	ENSG00000226482.1
hsa-mir-375	ADIPOQ-AS1	ENSG00000226482.1
hsa-mir-375	lnc-MRPS9-3	ENSG00000226508.1
hsa-mir-375	lnc-CXorf67-1	ENSG00000226530.1
hsa-mir-141	PAPPA-AS2	ENSG00000226604.2
hsa-mir-144	lnc-PPIAL4G-2	ENSG00000226637.1
hsa-mir-203	lnc-PPIAL4G-2	ENSG00000226637.1
hsa-mir-215	FAM66C	ENSG00000226711.2
hsa-mir-193b	FAM66C	ENSG00000226711.2
hsa-mir-205	FAM66C	ENSG00000226711.2
hsa-mir-205	lnc-TRMT61B-1	ENSG00000226833.1
hsa-mir-22	lnc-TRMT61B-1	ENSG00000226833.1
hsa-mir-22	lnc-DOCK4-1	ENSG00000226851.1
hsa-mir-141	lnc-FAM72B-5	ENSG00000227082.1
hsa-mir-200a	lnc-FAM72B-5	ENSG00000227082.1
hsa-mir-203	lnc-FAM72B-5	ENSG00000227082.1
hsa-mir-22	lnc-FAM72B-5	ENSG00000227082.1
hsa-mir-363	lnc-FAM72B-5	ENSG00000227082.1
hsa-mir-425	lnc-FAM72B-5	ENSG00000227082.1
hsa-mir-215	lnc-C1orf111-1	ENSG00000227094.1
hsa-mir-144	lnc-LRRFIP1-1	ENSG00000227107.1
hsa-mir-193b	lnc-LRRFIP1-1	ENSG00000227107.1
hsa-mir-193b	HORMAD2-AS1	ENSG00000227117.2
hsa-mir-22	lnc-C4orf42-3	ENSG00000227189.2
hsa-mir-22	lnc-RHOB-3	ENSG00000227210.1
hsa-mir-141	MIS18A-AS1	ENSG00000227256.1
hsa-mir-200a	MIS18A-AS1	ENSG00000227256.1
hsa-mir-190	lnc-NKAP-1	ENSG00000227285.1
hsa-mir-141	DLG1-AS1	ENSG00000227375.1
hsa-mir-200a	DLG1-AS1	ENSG00000227375.1
hsa-mir-375	DLG1-AS1	ENSG00000227375.1
hsa-mir-203	LINC01537	ENSG00000227467.3
hsa-mir-22	lnc-LAMB3-1	ENSG00000227591.1
hsa-mir-424	lnc-RNASET2-1	ENSG00000227598.1
hsa-mir-31	lnc-C6orf70-2	ENSG00000227704.1
hsa-mir-22	lnc-GLCCI1-1	ENSG00000227719.1
hsa-mir-203	lnc-MN1-2	ENSG00000227838.1
hsa-mir-183	lnc-KLHL31-2	ENSG00000227885.1
hsa-mir-22	lnc-KLHL31-2	ENSG00000227885.1
hsa-mir-22	lnc-SLC16A4-1	ENSG00000227963.1
hsa-mir-141	RAPGEF4-AS1	ENSG00000228016.1
hsa-mir-200a	RAPGEF4-AS1	ENSG00000228016.1
hsa-mir-182	RAPGEF4-AS1	ENSG00000228016.1
hsa-mir-215	RAPGEF4-AS1	ENSG00000228016.1
hsa-mir-429	RAPGEF4-AS1	ENSG00000228016.1
hsa-mir-205	RAPGEF4-AS1	ENSG00000228016.1
hsa-mir-21	RAPGEF4-AS1	ENSG00000228016.1
hsa-mir-22	RAPGEF4-AS1	ENSG00000228016.1
hsa-mir-375	RAPGEF4-AS1	ENSG00000228016.1
hsa-mir-200a	lnc-TSHB-3	ENSG00000228035.1
hsa-mir-145	lnc-TSHB-3	ENSG00000228035.1
hsa-mir-203	lnc-TSHB-3	ENSG00000228035.1
hsa-mir-31	lnc-TSHB-3	ENSG00000228035.1
hsa-mir-141	lnc-NXPH2-3	ENSG00000228043.1
hsa-mir-203	lnc-BMP8A-1	ENSG00000228060.1
hsa-mir-22	lnc-POU3F3-1	ENSG00000228528.1
hsa-mir-183	MEOX2-AS1	ENSG00000229108.1
hsa-mir-429	lnc-RPE-1	ENSG00000229127.1
hsa-mir-203	lnc-RPE-1	ENSG00000229127.1
hsa-mir-206	DLEU1-AS1	ENSG00000229323.1
hsa-mir-206	lnc-GMEB1-1	ENSG00000229388.1
hsa-mir-22	lnc-ATOH8-1	ENSG00000229498.1
hsa-mir-132	lnc-KCNQ4-1	ENSG00000229528.1
hsa-mir-205	SACS-AS1	ENSG00000229558.1
hsa-mir-22	SACS-AS1	ENSG00000229558.1
hsa-mir-22	lnc-ZCCHC24-2	ENSG00000229569.1
hsa-mir-424	ACVR2B-AS1	ENSG00000229589.1
hsa-mir-22	lnc-MLL3-1	ENSG00000229591.1
hsa-mir-141	LINC00341	ENSG00000229645.4
hsa-mir-200a	LINC00341	ENSG00000229645.4
hsa-mir-424	LINC00341	ENSG00000229645.4
hsa-mir-203	LINC00341	ENSG00000229645.4
hsa-mir-21	LINC00341	ENSG00000229645.4
hsa-mir-22	LINC00341	ENSG00000229645.4
hsa-mir-31	SDCBP2-AS1	ENSG00000229728.1
hsa-mir-375	lnc-ID2-2	ENSG00000229740.1
hsa-mir-195	lnc-C6orf221-2	ENSG00000229852.2
hsa-mir-203	lnc-C6orf221-2	ENSG00000229852.2
hsa-mir-31	lnc-C6orf221-2	ENSG00000229852.2
hsa-mir-22	lnc-RP3-486B10.1.1-4	ENSG00000229931.1
hsa-mir-31	lnc-RP3-486B10.1.1-4	ENSG00000229931.1
hsa-mir-182	lnc-FOXO1-2	ENSG00000230058.1
hsa-mir-183	lnc-FOXO1-2	ENSG00000230058.1
hsa-mir-31	lnc-FOXO1-2	ENSG00000230058.1
hsa-mir-375	lnc-FOXO1-2	ENSG00000230058.1
hsa-mir-200a	lnc-ACBD6-1	ENSG00000230124.2
hsa-mir-193b	lnc-ACBD6-1	ENSG00000230124.2
hsa-mir-429	lnc-ACBD6-1	ENSG00000230124.2
hsa-mir-31	lnc-ACBD6-1	ENSG00000230124.2
hsa-mir-222	lnc-NDUFA5-1	ENSG00000230442.1
hsa-mir-141	lnc-SNAP25-1	ENSG00000230506.1
hsa-mir-205	lnc-AL078585.1-7	ENSG00000230627.1
hsa-mir-141	LINC01362	ENSG00000230817.1
hsa-mir-22	LINC01362	ENSG00000230817.1
hsa-mir-22	lnc-FOXO6-3	ENSG00000230881.1
hsa-mir-193b	lnc-RP1-199H16.5.1-1	ENSG00000230912.1
hsa-mir-206	lnc-HDAC2-2	ENSG00000230943.1
hsa-mir-144	lnc-C22orf26-1	ENSG00000231010.1
hsa-mir-141	lnc-C10orf12-1	ENSG00000231025.1
hsa-mir-200a	lnc-C10orf12-1	ENSG00000231025.1
hsa-mir-144	lnc-C10orf12-1	ENSG00000231025.1
hsa-mir-375	lnc-C10orf12-1	ENSG00000231025.1
hsa-mir-429	lnc-NCOA3-3	ENSG00000231119.2
hsa-mir-141	MORF4L2-AS1	ENSG00000231154.1
hsa-mir-200a	MORF4L2-AS1	ENSG00000231154.1
hsa-mir-193b	MORF4L2-AS1	ENSG00000231154.1
hsa-mir-141	ITPR1-AS1	ENSG00000231249.1
hsa-mir-375	lnc-ADAMTS16-5	ENSG00000231291.3
hsa-mir-141	lnc-KIAA1257-1	ENSG00000231305.3
hsa-mir-200a	lnc-KIAA1257-1	ENSG00000231305.3
hsa-mir-429	lnc-KIAA1257-1	ENSG00000231305.3
hsa-mir-144	lnc-HAO2-2	ENSG00000231365.1
hsa-mir-144	lnc-KIAA0564-1	ENSG00000231530.1
hsa-mir-193b	lnc-KIAA0564-1	ENSG00000231530.1
hsa-mir-200a	lnc-BUD13-1	ENSG00000231611.1
hsa-mir-22	lnc-IGSF5-1	ENSG00000231713.2
hsa-mir-144	lnc-TGFBRAP1-3	ENSG00000231851.1
hsa-mir-429	lnc-TGFBRAP1-3	ENSG00000231851.1
hsa-mir-22	lnc-SEMA3D-1	ENSG00000232019.1
hsa-mir-503	lnc-C21orf33-2	ENSG00000232124.1
hsa-mir-22	LINC00865	ENSG00000232229.1
hsa-mir-203	lnc-CXCR7-1	ENSG00000232328.1
hsa-mir-205	lnc-CXCR7-1	ENSG00000232328.1
hsa-mir-424	lnc-TTC21B-1	ENSG00000232411.1
hsa-mir-31	lnc-RBMX-1	ENSG00000232611.1
hsa-mir-145	IDI2-AS1	ENSG00000232656.3
hsa-mir-203	lnc-CD53-1	ENSG00000232811.1
hsa-mir-22	lnc-CD53-1	ENSG00000232811.1
hsa-mir-451	lnc-CD53-1	ENSG00000232811.1
hsa-mir-96	lnc-HDAC9-2	ENSG00000232821.1
hsa-mir-182	lnc-HDAC9-2	ENSG00000232821.1
hsa-mir-205	lnc-HDAC9-2	ENSG00000232821.1
hsa-mir-203	lnc-JAG1-2	ENSG00000232900.1
hsa-mir-144	LINC00342	ENSG00000232931.1
hsa-mir-193b	LINC00342	ENSG00000232931.1
hsa-mir-203	LINC00342	ENSG00000232931.1
hsa-mir-205	LINC00342	ENSG00000232931.1
hsa-mir-375	LINC00342	ENSG00000232931.1
hsa-mir-200a	lnc-TTLL7-2	ENSG00000233008.1
hsa-mir-144	lnc-TTLL7-2	ENSG00000233008.1
hsa-mir-193b	lnc-TTLL7-2	ENSG00000233008.1
hsa-mir-22	lnc-TTLL7-2	ENSG00000233008.1
hsa-mir-375	lnc-TTLL7-2	ENSG00000233008.1
hsa-mir-141	lnc-RP11-279O9.4.1-1	ENSG00000233110.1
hsa-mir-200a	lnc-RP11-279O9.4.1-1	ENSG00000233110.1
hsa-mir-31	lnc-PCSK9-4	ENSG00000233147.1
hsa-mir-21	B4GALT1-AS1	ENSG00000233554.1
hsa-mir-200a	lnc-CRYBA4-7	ENSG00000233574.1
hsa-mir-31	lnc-CRYBA4-7	ENSG00000233574.1
hsa-mir-424	lnc-PAPOLG-1	ENSG00000233953.1
hsa-mir-144	lnc-SNX17-1	ENSG00000234072.1
hsa-mir-144	lnc-MYB-2	ENSG00000234084.1
hsa-mir-144	lnc-POM121L4P-2	ENSG00000234252.1
hsa-mir-215	lnc-POM121L4P-2	ENSG00000234252.1
hsa-mir-141	lnc-TCEAL4-2	ENSG00000234405.1
hsa-mir-200a	lnc-TCEAL4-2	ENSG00000234405.1
hsa-mir-200a	SNRK-AS1	ENSG00000234617.1
hsa-mir-375	lnc-NCF4-2	ENSG00000234688.1
hsa-mir-424	lnc-CALM2-2	ENSG00000234690.2
hsa-mir-193b	lnc-CALM2-2	ENSG00000234690.2
hsa-mir-203	lnc-CALM2-2	ENSG00000234690.2
hsa-mir-205	lnc-CALM2-2	ENSG00000234690.2
hsa-mir-31	lnc-CALM2-2	ENSG00000234690.2
hsa-mir-429	lnc-PSMC2-1	ENSG00000234715.1
hsa-mir-200a	SLC25A25-AS1	ENSG00000234771.2
hsa-mir-215	SLC25A25-AS1	ENSG00000234771.2
hsa-mir-193b	SLC25A25-AS1	ENSG00000234771.2
hsa-mir-22	SLC25A25-AS1	ENSG00000234771.2
hsa-mir-31	SLC25A25-AS1	ENSG00000234771.2
hsa-mir-375	SLC25A25-AS1	ENSG00000234771.2
hsa-mir-141	LINC00412	ENSG00000234772.1
hsa-mir-22	lnc-DTYMK-4	ENSG00000234793.1
hsa-mir-215	lnc-PCSK9-4	ENSG00000234810.1
hsa-mir-215	LINC01239	ENSG00000234840.1
hsa-mir-363	LINC01239	ENSG00000234840.1
hsa-mir-155	lnc-LRP5L-2	ENSG00000234884.1
hsa-mir-205	lnc-LRP5L-2	ENSG00000234884.1
hsa-mir-375	lnc-LRP5L-2	ENSG00000234884.1
hsa-mir-205	ID2-AS1	ENSG00000235092.1
hsa-mir-200a	lnc-WDR5-1	ENSG00000235138.1
hsa-mir-424	TTC21B-AS1	ENSG00000235192.1
hsa-mir-206	lnc-PEX26-1	ENSG00000235295.1
hsa-mir-22	RFX3-AS1	ENSG00000235326.1
hsa-mir-223	lnc-OR4F16-3	ENSG00000235373.1
hsa-mir-31	lnc-TFB1M-1	ENSG00000235381.1
hsa-mir-193b	lnc-KCNA10-1	ENSG00000235407.1
hsa-mir-22	lnc-KCNA10-1	ENSG00000235407.1
hsa-mir-150	LINC00402	ENSG00000235532.1
hsa-mir-429	LINC01057	ENSG00000235565.1
hsa-mir-22	LINC01057	ENSG00000235565.1
hsa-mir-375	LINC01057	ENSG00000235565.1
hsa-mir-200a	LINC00894	ENSG00000235703.1
hsa-mir-223	LINC00894	ENSG00000235703.1
hsa-mir-144	lnc-CTH-3	ENSG00000235782.1
hsa-mir-22	lnc-PSMG1-7	ENSG00000235888.1
hsa-mir-22	lnc-NTM-5	ENSG00000236129.1
hsa-mir-193b	KDM4A-AS1	ENSG00000236200.1
hsa-mir-22	KDM4A-AS1	ENSG00000236200.1
hsa-mir-22	lnc-C11orf30-1	ENSG00000236304.1
hsa-mir-31	lnc-FCN2-1	ENSG00000236403.1
hsa-mir-429	lnc-JAG1-6	ENSG00000236526.1
hsa-mir-182	MYB-AS1	ENSG00000236703.1
hsa-mir-193b	LINC01186	ENSG00000236751.1
hsa-mir-206	LINC01563	ENSG00000236819.1
hsa-mir-203	lnc-RASGRP1-4	ENSG00000236914.3
hsa-mir-205	lnc-RASGRP1-4	ENSG00000236914.3
hsa-mir-363	lnc-RASGRP1-4	ENSG00000236914.3
hsa-mir-375	lnc-RASGRP1-4	ENSG00000236914.3
hsa-mir-182	CNTFR-AS1	ENSG00000237159.1
hsa-mir-205	CNTFR-AS1	ENSG00000237159.1
hsa-mir-31	CNTFR-AS1	ENSG00000237159.1
hsa-mir-215	lnc-AUH-1	ENSG00000237422.1
hsa-mir-22	lnc-ERP44-3	ENSG00000237461.1
hsa-mir-141	lnc-AIFM3-1	ENSG00000237476.1
hsa-mir-22	lnc-NTM-2	ENSG00000237612.1
hsa-mir-141	lnc-CYP3A43-2	ENSG00000237640.1
hsa-mir-200a	lnc-CYP3A43-2	ENSG00000237640.1
hsa-mir-203	lnc-MIER3-2	ENSG00000237705.1
hsa-mir-31	lnc-ACD-1	ENSG00000237718.1
hsa-mir-141	lnc-NUF2-1	ENSG00000237756.1
hsa-mir-200a	lnc-NUF2-1	ENSG00000237756.1
hsa-mir-31	lnc-ATP6V1H-1	ENSG00000237807.3
hsa-mir-200a	lnc-PTPRU-1	ENSG00000237934.1
hsa-mir-200a	lnc-SIK1-5	ENSG00000237989.1
hsa-mir-22	lnc-IAH1-1	ENSG00000239300.1
hsa-mir-22	LINC00630	ENSG00000239407.1
hsa-mir-203	lnc-LSS-1	ENSG00000239415.1
hsa-mir-144	SIDT1-AS1	ENSG00000239453.1
hsa-mir-206	lnc-ZIC1-5	ENSG00000239922.1
hsa-mir-203	lnc-NT5DC1-2	ENSG00000240050.1
hsa-mir-22	lnc-GTPBP8-1	ENSG00000240057.1
hsa-mir-150	lnc-SASH3-1	ENSG00000240143.1
hsa-mir-205	lnc-SERPINI1-3	ENSG00000240292.1
hsa-mir-429	lnc-ACAP3-1	ENSG00000240731.1
hsa-mir-141	lnc-FAM20C-3	ENSG00000240859.1
hsa-mir-200a	lnc-FAM20C-3	ENSG00000240859.1
hsa-mir-144	lnc-FAM20C-3	ENSG00000240859.1
hsa-mir-429	lnc-FAM20C-3	ENSG00000240859.1
hsa-mir-215	lnc-ZMYM6-1	ENSG00000241014.1
hsa-mir-206	lnc-ZMYM6-1	ENSG00000241014.1
hsa-mir-211	WWTR1-AS1	ENSG00000241313.2
hsa-mir-375	WWTR1-AS1	ENSG00000241313.2
hsa-mir-215	lnc-TRRAP-1	ENSG00000242687.2
hsa-mir-429	lnc-TRRAP-1	ENSG00000242687.2
hsa-mir-203	lnc-TRRAP-1	ENSG00000242687.2
hsa-mir-22	lnc-TRRAP-1	ENSG00000242687.2
hsa-mir-31	lnc-TRRAP-1	ENSG00000242687.2
hsa-mir-206	LINC01487	ENSG00000242790.1
hsa-mir-205	lnc-TMEM63A-1	ENSG00000242861.1
hsa-mir-215	lnc-SERPINI1-2	ENSG00000242924.1
hsa-mir-203	lnc-LRRD1-1	ENSG00000243107.1
hsa-mir-200a	DUBR	ENSG00000243701.1
hsa-mir-203	lnc-SERPINI1-1	ENSG00000244214.1
hsa-mir-141	lnc-XRN1-1	ENSG00000244327.1
hsa-mir-200a	lnc-XRN1-1	ENSG00000244327.1
hsa-mir-375	lnc-C6orf100-3	ENSG00000244349.1
hsa-mir-203	lnc-PDCD10-1	ENSG00000244706.2
hsa-mir-215	LIFR-AS1	ENSG00000244968.2
hsa-mir-204	LIFR-AS1	ENSG00000244968.2
hsa-mir-215	A2M-AS1	ENSG00000245105.1
hsa-mir-31	A2M-AS1	ENSG00000245105.1
hsa-mir-193b	lnc-HMGB2-3	ENSG00000245213.2
hsa-mir-429	lnc-HMGB2-3	ENSG00000245213.2
hsa-mir-424	SCAMP1-AS1	ENSG00000245556.2
hsa-mir-429	SCAMP1-AS1	ENSG00000245556.2
hsa-mir-215	lnc-MPEG1-2	ENSG00000245571.2
hsa-mir-193b	lnc-MPEG1-2	ENSG00000245571.2
hsa-mir-451	lnc-MPEG1-2	ENSG00000245571.2
hsa-mir-429	BDNF-AS	ENSG00000245573.3
hsa-mir-205	BDNF-AS	ENSG00000245573.3
hsa-mir-152	lnc-UBLCP1-5	ENSG00000245812.2
hsa-mir-424	lnc-UBLCP1-5	ENSG00000245812.2
hsa-mir-187	lnc-UBLCP1-5	ENSG00000245812.2
hsa-mir-203	lnc-UBLCP1-5	ENSG00000245812.2
hsa-mir-200a	lnc-ADAM10-1	ENSG00000245975.2
hsa-mir-215	lnc-ADAM10-1	ENSG00000245975.2
hsa-mir-211	lnc-ADAM10-1	ENSG00000245975.2
hsa-mir-193b	ALDH1L1-AS2	ENSG00000246022.2
hsa-mir-508	ALDH1L1-AS2	ENSG00000246022.2
hsa-mir-205	lnc-METAP1-3	ENSG00000246090.2
hsa-mir-141	lnc-TNFRSF10C-1	ENSG00000246130.1
hsa-mir-144	RRS1-AS1	ENSG00000246145.1
hsa-mir-144	lnc-GAS2-1	ENSG00000246225.2
hsa-mir-132	lnc-ALX4-5	ENSG00000246250.2
hsa-mir-22	UBR5-AS1	ENSG00000246263.2
hsa-mir-31	lnc-WNT8A-2	ENSG00000246323.2
hsa-mir-375	lnc-WNT8A-2	ENSG00000246323.2
hsa-mir-31	CACNA1C-AS1	ENSG00000246627.2
hsa-mir-451	CACNA1C-AS1	ENSG00000246627.2
hsa-mir-144	lnc-SAMD14-3	ENSG00000246640.1
hsa-mir-22	lnc-SAMD14-3	ENSG00000246640.1
hsa-mir-375	lnc-SAMD14-3	ENSG00000246640.1
hsa-mir-203	PLA2G4E-AS1	ENSG00000246740.2
hsa-mir-22	lnc-NECAB1-1	ENSG00000246792.2
hsa-mir-424	STARD4-AS1	ENSG00000246859.2
hsa-mir-200a	LINC00920	ENSG00000246898.1
hsa-mir-205	LINC00920	ENSG00000246898.1
hsa-mir-429	CSTF3-AS1	ENSG00000247151.2
hsa-mir-141	UBL7-AS1	ENSG00000247240.3
hsa-mir-200a	UBL7-AS1	ENSG00000247240.3
hsa-mir-451	UBL7-AS1	ENSG00000247240.3
hsa-mir-31	lnc-CYP11B2-1	ENSG00000247317.3
hsa-mir-144	lnc-EIF2B1-1	ENSG00000247373.2
hsa-mir-203	lnc-EIF2B1-1	ENSG00000247373.2
hsa-mir-22	lnc-EIF2B1-1	ENSG00000247373.2
hsa-mir-144	lnc-B4GALT7-1	ENSG00000247679.2
hsa-mir-203	lnc-B4GALT7-1	ENSG00000247679.2
hsa-mir-424	SEC24B-AS1	ENSG00000247950.2
hsa-mir-205	SEC24B-AS1	ENSG00000247950.2
hsa-mir-22	FAM13A-AS1	ENSG00000248019.2
hsa-mir-141	lnc-PGR-1	ENSG00000248027.1
hsa-mir-144	UBA6-AS1	ENSG00000248049.2
hsa-mir-429	UBA6-AS1	ENSG00000248049.2
hsa-mir-203	UBA6-AS1	ENSG00000248049.2
hsa-mir-205	UBA6-AS1	ENSG00000248049.2
hsa-mir-22	UBA6-AS1	ENSG00000248049.2
hsa-mir-31	UBA6-AS1	ENSG00000248049.2
hsa-mir-375	UBA6-AS1	ENSG00000248049.2
hsa-mir-203	TRIM52-AS1	ENSG00000248275.1
hsa-mir-375	TRIM52-AS1	ENSG00000248275.1
hsa-mir-144	lnc-AADAT-4	ENSG00000248339.1
hsa-mir-215	lnc-AADAT-4	ENSG00000248339.1
hsa-mir-429	lnc-AADAT-4	ENSG00000248339.1
hsa-mir-203	lnc-AADAT-4	ENSG00000248339.1
hsa-mir-31	lnc-AADAT-4	ENSG00000248339.1
hsa-mir-200a	lnc-TMEM144-1	ENSG00000248429.1
hsa-mir-203	lnc-TMEM144-1	ENSG00000248429.1
hsa-mir-22	lnc-TMEM144-1	ENSG00000248429.1
hsa-mir-217	LINC01197	ENSG00000248441.2
hsa-mir-192	lnc-AP3S1-2	ENSG00000248709.1
hsa-mir-22	lnc-FGF3-2	ENSG00000248844.2
hsa-mir-508	lnc-PCDH18-2	ENSG00000248869.1
hsa-mir-222	lnc-HTRA3-1	ENSG00000248986.1
hsa-mir-22	lnc-G3BP1-2	ENSG00000249035.2
hsa-mir-203	lnc-ANKRD34B-2	ENSG00000249042.1
hsa-mir-222	lnc-HTRA3-1	ENSG00000249145.1
hsa-mir-144	lnc-AP3S1-4	ENSG00000249249.1
hsa-mir-206	lnc-AP3S1-4	ENSG00000249249.1
hsa-mir-508	lnc-AP3S1-4	ENSG00000249249.1
hsa-mir-31	lnc-AP3S1-4	ENSG00000249249.1
hsa-mir-205	lnc-POLR3G-2	ENSG00000249265.1
hsa-mir-429	LINC00939	ENSG00000249267.2
hsa-mir-203	LINC00939	ENSG00000249267.2
hsa-mir-223	LINC00939	ENSG00000249267.2
hsa-mir-223	UGDH-AS1	ENSG00000249348.1
hsa-mir-132	LINC01060	ENSG00000249378.1
hsa-mir-424	LINC01060	ENSG00000249378.1
hsa-mir-203	LINC01060	ENSG00000249378.1
hsa-mir-205	LINC01060	ENSG00000249378.1
hsa-mir-22	lnc-PLEKHG4B-1	ENSG00000249430.1
hsa-mir-222	LINC01091	ENSG00000249464.1
hsa-mir-203	lnc-DTWD2-1	ENSG00000249494.1
hsa-mir-22	lnc-FAM20C-6	ENSG00000249574.1
hsa-mir-141	MCPH1-AS1	ENSG00000249898.3
hsa-mir-205	MCPH1-AS1	ENSG00000249898.3
hsa-mir-223	MCPH1-AS1	ENSG00000249898.3
hsa-mir-203	lnc-ALB-1	ENSG00000250220.1
hsa-mir-31	lnc-ALB-1	ENSG00000250220.1
hsa-mir-215	lnc-TRIM41-3	ENSG00000250222.1
hsa-mir-141	lnc-SPATA9-1	ENSG00000250240.1
hsa-mir-200a	lnc-SPATA9-1	ENSG00000250240.1
hsa-mir-141	lnc-PTS-1	ENSG00000250303.2
hsa-mir-200a	lnc-PTS-1	ENSG00000250303.2
hsa-mir-203	lnc-PTS-1	ENSG00000250303.2
hsa-mir-205	lnc-PTS-1	ENSG00000250303.2
hsa-mir-22	lnc-PTS-1	ENSG00000250303.2
hsa-mir-375	lnc-PTS-1	ENSG00000250303.2
hsa-mir-203	LINC00989	ENSG00000250334.1
hsa-mir-508	LINC00989	ENSG00000250334.1
hsa-mir-203	lnc-STIM1-1	ENSG00000250404.1
hsa-mir-31	lnc-STIM1-1	ENSG00000250404.1
hsa-mir-375	lnc-PPA2-2	ENSG00000250522.1
hsa-mir-204	lnc-ALDH7A1-1	ENSG00000250602.1
hsa-mir-205	lnc-ALDH7A1-1	ENSG00000250602.1
hsa-mir-21	lnc-EXOC1-1	ENSG00000250821.1
hsa-mir-508	lnc-EXOC1-1	ENSG00000250821.1
hsa-mir-31	lnc-EXOC1-1	ENSG00000250821.1
hsa-mir-141	lnc-CHRNA9-2	ENSG00000250893.1
hsa-mir-200a	lnc-CHRNA9-2	ENSG00000250893.1
hsa-mir-144	lnc-CHRNA9-2	ENSG00000250893.1
hsa-mir-429	lnc-CHRNA9-2	ENSG00000250893.1
hsa-mir-22	lnc-AADAT-3	ENSG00000250968.1
hsa-mir-141	SNHG21	ENSG00000250988.3
hsa-mir-200a	SNHG21	ENSG00000250988.3
hsa-mir-206	lnc-PHF15-2	ENSG00000250994.1
hsa-mir-429	lnc-PRELID2-4	ENSG00000251031.1
hsa-mir-31	lnc-AC091435.2-2	ENSG00000251189.1
hsa-mir-203	lnc-SCGB3A2-1	ENSG00000251320.1
hsa-mir-215	lnc-CYB5R2-3	ENSG00000251364.2
hsa-mir-205	lnc-CYB5R2-3	ENSG00000251364.2
hsa-mir-363	lnc-CYB5R2-3	ENSG00000251364.2
hsa-mir-31	lnc-CYB5R2-3	ENSG00000251364.2
hsa-mir-215	LINC01301	ENSG00000251396.2
hsa-mir-193b	LINC01301	ENSG00000251396.2
hsa-mir-203	lnc-ATXN2L-1	ENSG00000251417.1
hsa-mir-22	LINC01267	ENSG00000251576.1
hsa-mir-206	TET2-AS1	ENSG00000251586.1
hsa-mir-205	TET2-AS1	ENSG00000251586.1
hsa-mir-31	lnc-SH3D19-1	ENSG00000251611.1
hsa-mir-141	lnc-CCRN4L-9	ENSG00000251632.1
hsa-mir-203	lnc-CCRN4L-9	ENSG00000251632.1
hsa-mir-193b	lnc-TRIB1-1	ENSG00000253111.1
hsa-mir-183	lnc-AC117834.1-3	ENSG00000253177.1
hsa-mir-203	lnc-AC117834.1-3	ENSG00000253177.1
hsa-mir-21	lnc-AC117834.1-3	ENSG00000253177.1
hsa-mir-203	lnc-PRAGMIN.1-4	ENSG00000253343.1
hsa-mir-182	lnc-RP11-422N16.3.1-4	ENSG00000253434.1
hsa-mir-205	lnc-RP11-422N16.3.1-4	ENSG00000253434.1
hsa-mir-508	lnc-RP11-422N16.3.1-4	ENSG00000253434.1
hsa-mir-203	lnc-C5orf58-1	ENSG00000253647.1
hsa-mir-205	lnc-C5orf58-1	ENSG00000253647.1
hsa-mir-22	lnc-C5orf58-1	ENSG00000253647.1
hsa-mir-31	lnc-RP1L1-2	ENSG00000253649.1
hsa-mir-141	ZFHX4-AS1	ENSG00000253661.1
hsa-mir-200a	ZFHX4-AS1	ENSG00000253661.1
hsa-mir-31	ZFHX4-AS1	ENSG00000253661.1
hsa-mir-375	ZFHX4-AS1	ENSG00000253661.1
hsa-mir-141	lnc-BOD1-1	ENSG00000253686.1
hsa-mir-200a	lnc-BOD1-1	ENSG00000253686.1
hsa-mir-31	lnc-AL901608.1-1	ENSG00000253701.1
hsa-mir-205	CARMN	ENSG00000253864.1
hsa-mir-223	CARMN	ENSG00000253864.1
hsa-mir-222	lnc-NKAIN3-7	ENSG00000253894.1
hsa-mir-424	lnc-PANK3-2	ENSG00000253978.1
hsa-mir-141	lnc-KHDRBS3-4	ENSG00000254028.1
hsa-mir-22	lnc-KHDRBS3-4	ENSG00000254028.1
hsa-mir-215	lnc-ATP6V1B2-6	ENSG00000254040.1
hsa-mir-205	lnc-ATP6V1B2-6	ENSG00000254040.1
hsa-mir-22	lnc-ATP6V1B2-6	ENSG00000254040.1
hsa-mir-375	lnc-ATP6V1B2-6	ENSG00000254040.1
hsa-mir-22	lnc-RARS-2	ENSG00000254042.1
hsa-mir-22	RBPMS-AS1	ENSG00000254109.1
hsa-mir-31	RBPMS-AS1	ENSG00000254109.1
hsa-mir-375	RBPMS-AS1	ENSG00000254109.1
hsa-mir-141	lnc-LSM11-7	ENSG00000254135.1
hsa-mir-200a	lnc-LSM11-7	ENSG00000254135.1
hsa-mir-429	lnc-LSM11-7	ENSG00000254135.1
hsa-mir-203	lnc-RGS20-1	ENSG00000254204.1
hsa-mir-203	lnc-BOD1-1	ENSG00000254211.1
hsa-mir-31	lnc-BOD1-1	ENSG00000254211.1
hsa-mir-383	lnc-BOD1-1	ENSG00000254211.1
hsa-mir-215	lnc-CHCHD7-1	ENSG00000254254.1
hsa-mir-107	lnc-CYorf17-2	ENSG00000254488.1
hsa-mir-203	lnc-CLP1-3	ENSG00000254602.1
hsa-mir-429	WAC-AS1	ENSG00000254635.1
hsa-mir-424	lnc-LRRC32-1	ENSG00000254810.1
hsa-mir-193b	lnc-MAP6-4	ENSG00000254814.1
hsa-mir-144	TMEM9B-AS1	ENSG00000254860.1
hsa-mir-22	TMEM9B-AS1	ENSG00000254860.1
hsa-mir-22	lnc-TMEM86A-1	ENSG00000254966.1
hsa-mir-363	lnc-VSIG2-1	ENSG00000255045.1
hsa-mir-375	lnc-EPS8L2-1	ENSG00000255158.1
hsa-mir-22	lnc-ANKRD42-2	ENSG00000255234.1
hsa-mir-144	lnc-GLYATL2-2	ENSG00000255240.1
hsa-mir-429	lnc-GLYATL2-2	ENSG00000255240.1
hsa-mir-205	lnc-RP11-315O6.2.1-1	ENSG00000255337.1
hsa-mir-31	lnc-RP11-315O6.2.1-1	ENSG00000255337.1
hsa-mir-508	lnc-FZD4-1	ENSG00000255471.1
hsa-mir-375	lnc-FZD4-1	ENSG00000255471.1
hsa-mir-200a	lnc-MAP6-4	ENSG00000255507.1
hsa-mir-215	lnc-C12orf39-1	ENSG00000255644.1
hsa-mir-31	lnc-C12orf39-1	ENSG00000255644.1
hsa-mir-22	lnc-CAPZA3-1	ENSG00000255648.1
hsa-mir-107	lnc-CAPZA3-1	ENSG00000255648.1
hsa-mir-203	FAM222A-AS1	ENSG00000255650.1
hsa-mir-31	FAM222A-AS1	ENSG00000255650.1
hsa-mir-195	TMEM5-AS1	ENSG00000255850.1
hsa-mir-22	PXN-AS1	ENSG00000255857.1
hsa-mir-22	lnc-DDX51-6	ENSG00000255933.1
hsa-mir-215	LINC01152	ENSG00000256124.1
hsa-mir-205	LINC01152	ENSG00000256124.1
hsa-mir-22	lnc-ANO2-1	ENSG00000256218.1
hsa-mir-203	lnc-SLC6A12-11	ENSG00000256540.1
hsa-mir-205	lnc-SLC6A12-11	ENSG00000256540.1
hsa-mir-31	lnc-SLC6A12-11	ENSG00000256540.1
hsa-mir-22	lnc-GALNT9-1	ENSG00000256576.1
hsa-mir-215	lnc-C12orf39-1	ENSG00000256615.1
hsa-mir-203	lnc-SLC6A12-2	ENSG00000256694.1
hsa-mir-200a	lnc-KIAA0528-3	ENSG00000257023.1
hsa-mir-193b	lnc-LRIG3-1	ENSG00000257259.1
hsa-mir-193b	lnc-TESC-1	ENSG00000257279.1
hsa-mir-141	lnc-POTEG-13	ENSG00000257310.1
hsa-mir-205	lnc-MON2-2	ENSG00000257354.1
hsa-mir-141	lnc-CD63-1	ENSG00000257509.1
hsa-mir-200a	lnc-CD63-1	ENSG00000257509.1
hsa-mir-205	lnc-KRT81-3	ENSG00000257671.1
hsa-mir-424	lnc-NT5DC3-1	ENSG00000257681.1
hsa-mir-31	lnc-NT5DC3-1	ENSG00000257681.1
hsa-mir-200a	lnc-PUS7L-1	ENSG00000257742.1
hsa-mir-190	lnc-PUS7L-1	ENSG00000257742.1
hsa-mir-429	lnc-PUS7L-1	ENSG00000257742.1
hsa-mir-203	lnc-PUS7L-1	ENSG00000257742.1
hsa-mir-22	lnc-PUS7L-1	ENSG00000257742.1
hsa-mir-193b	lnc-MAP1LC3B2-1	ENSG00000258102.1
hsa-mir-205	lnc-MYL2-1	ENSG00000258240.1
hsa-mir-205	lnc-RP11-116D17.1.1-12	ENSG00000258254.1
hsa-mir-375	lnc-RP11-116D17.1.1-12	ENSG00000258254.1
hsa-mir-200a	lnc-ANGEL1-1	ENSG00000258301.2
hsa-mir-22	lnc-ANGEL1-1	ENSG00000258301.2
hsa-mir-206	lnc-SMOC1-2	ENSG00000258422.1
hsa-mir-144	lnc-PSMB11-1	ENSG00000258457.1
hsa-mir-205	lnc-PSMB11-1	ENSG00000258457.1
hsa-mir-22	lnc-PSMB11-1	ENSG00000258457.1
hsa-mir-203	lnc-APEX1-1	ENSG00000258515.1
hsa-mir-375	lnc-APEX1-1	ENSG00000258515.1
hsa-mir-141	lnc-PPP1R13B-1	ENSG00000258534.1
hsa-mir-200a	lnc-PPP1R13B-1	ENSG00000258534.1
hsa-mir-141	RHOXF1-AS1	ENSG00000258545.1
hsa-mir-200a	RHOXF1-AS1	ENSG00000258545.1
hsa-mir-193b	LINC00645	ENSG00000258548.1
hsa-mir-31	LINC00645	ENSG00000258548.1
hsa-mir-200a	LINC01500	ENSG00000258583.1
hsa-mir-451	lnc-MLH3-1	ENSG00000258646.1
hsa-mir-215	lnc-KIAA0284-2	ENSG00000258811.1
hsa-mir-182	lnc-IRF2BPL-1	ENSG00000258819.1
hsa-mir-215	lnc-IRF2BPL-1	ENSG00000258819.1
hsa-mir-193b	lnc-FAM161B-1	ENSG00000258891.1
hsa-mir-200a	lnc-PTGR2-1	ENSG00000259065.1
hsa-mir-424	LINC00924	ENSG00000259134.1
hsa-mir-375	lnc-LRRK1-3	ENSG00000259172.1
hsa-mir-141	lnc-PHGR1-2	ENSG00000259198.1
hsa-mir-200a	lnc-PHGR1-2	ENSG00000259198.1
hsa-mir-429	lnc-PHGR1-2	ENSG00000259198.1
hsa-mir-22	ENSG00000259206.1	ENSG00000259206.1
hsa-mir-141	lnc-CTD-2054N24.2.1-2	ENSG00000259219.1
hsa-mir-200a	lnc-CTD-2054N24.2.1-2	ENSG00000259219.1
hsa-mir-203	lnc-CTD-2054N24.2.1-2	ENSG00000259219.1
hsa-mir-22	lnc-CTD-2054N24.2.1-2	ENSG00000259219.1
hsa-mir-200a	lnc-C2CD4A-1	ENSG00000259251.2
hsa-mir-141	lnc-AVEN-1	ENSG00000259287.1
hsa-mir-200a	lnc-AVEN-1	ENSG00000259287.1
hsa-mir-144	lnc-DNAJA4-1	ENSG00000259322.1
hsa-mir-375	TMC3-AS1	ENSG00000259343.1
hsa-mir-375	lnc-RP11-342M21.2.1-1	ENSG00000259347.1
hsa-mir-22	lnc-KLHL25-1	ENSG00000259407.1
hsa-mir-22	lnc-ETFA-1	ENSG00000259422.1
hsa-mir-203	lnc-ANP32A-3	ENSG00000259426.1
hsa-mir-22	lnc-WHAMM-3	ENSG00000259442.1
hsa-mir-223	lnc-WHAMM-3	ENSG00000259442.1
hsa-mir-205	lnc-RP11-82I10.1.1-7	ENSG00000259524.1
hsa-mir-205	lnc-MAPK6-7	ENSG00000259577.1
hsa-mir-141	lnc-SPG11-3	ENSG00000259595.1
hsa-mir-200a	lnc-SPG11-3	ENSG00000259595.1
hsa-mir-141	lnc-PSTPIP1-1	ENSG00000259652.1
hsa-mir-200a	lnc-PSTPIP1-1	ENSG00000259652.1
hsa-mir-363	lnc-RP11-82I10.1.1-7	ENSG00000259664.1
hsa-mir-200a	IQCH-AS1	ENSG00000259673.1
hsa-mir-193b	IQCH-AS1	ENSG00000259673.1
hsa-mir-429	IQCH-AS1	ENSG00000259673.1
hsa-mir-211	IQCH-AS1	ENSG00000259673.1
hsa-mir-205	IQCH-AS1	ENSG00000259673.1
hsa-mir-22	IQCH-AS1	ENSG00000259673.1
hsa-mir-22	CRTC3-AS1	ENSG00000259736.1
hsa-mir-31	lnc-FBXL16-1	ENSG00000259840.1
hsa-mir-375	lnc-FBXL16-1	ENSG00000259840.1
hsa-mir-203	lnc-CDH11-1	ENSG00000259847.1
hsa-mir-215	lnc-U82695.9.1-1	ENSG00000259886.1
hsa-mir-22	lnc-U82695.9.1-1	ENSG00000259886.1
hsa-mir-31	lnc-U82695.9.1-1	ENSG00000259886.1
hsa-mir-375	lnc-DHX38-4	ENSG00000259901.1
hsa-mir-429	lnc-ZSWIM2-2	ENSG00000259915.1
hsa-mir-424	lnc-AC006050.2.1-1	ENSG00000259928.1
hsa-mir-31	lnc-AC006050.2.1-1	ENSG00000259928.1
hsa-mir-193b	lnc-COL9A2-1	ENSG00000259943.1
hsa-mir-429	lnc-COL9A2-1	ENSG00000259943.1
hsa-mir-223	lnc-COL9A2-1	ENSG00000259943.1
hsa-mir-375	lnc-COL9A2-1	ENSG00000259943.1
hsa-mir-144	lnc-CORIN-1	ENSG00000259959.1
hsa-mir-429	lnc-CORIN-1	ENSG00000259959.1
hsa-mir-31	lnc-CLEC18B-7	ENSG00000259972.1
hsa-mir-222	lnc-SH3GL3-5	ENSG00000259986.1
hsa-mir-215	lnc-AC110373.1-2	ENSG00000260091.1
hsa-mir-193b	LINC01070	ENSG00000260102.1
hsa-mir-508	LINC01070	ENSG00000260102.1
hsa-mir-22	LINC01070	ENSG00000260102.1
hsa-mir-375	lnc-ZNF469-1	ENSG00000260166.1
hsa-mir-205	lnc-GRAMD3-2	ENSG00000260192.1
hsa-mir-31	lnc-SCAP-1	ENSG00000260236.1
hsa-mir-193b	lnc-TNK2-2	ENSG00000260261.1
hsa-mir-203	lnc-TNK2-2	ENSG00000260261.1
hsa-mir-203	lnc-GJA10-4	ENSG00000260271.1
hsa-mir-22	lnc-PMM2-2	ENSG00000260276.1
hsa-mir-451	lnc-PMM2-2	ENSG00000260276.1
hsa-mir-31	lnc-MTERFD3-1	ENSG00000260329.1
hsa-mir-141	lnc-RGMA-3	ENSG00000260361.1
hsa-mir-200a	lnc-RGMA-3	ENSG00000260361.1
hsa-mir-193b	lnc-MAP7-1	ENSG00000260418.1
hsa-mir-141	lnc-C8orf59-2	ENSG00000260493.1
hsa-mir-200a	lnc-C8orf59-2	ENSG00000260493.1
hsa-mir-141	lnc-GCSH-1	ENSG00000260495.1
hsa-mir-200a	lnc-GCSH-1	ENSG00000260495.1
hsa-mir-144	lnc-GCSH-1	ENSG00000260495.1
hsa-mir-144	lnc-TIFA-1	ENSG00000260526.1
hsa-mir-22	lnc-TIFA-1	ENSG00000260526.1
hsa-mir-206	lnc-GATA5-1	ENSG00000260542.1
hsa-mir-215	lnc-ATP6V0E2-1	ENSG00000260555.1
hsa-mir-93	lnc-GDE1-1	ENSG00000260592.1
hsa-mir-182	lnc-RAP1GDS1-3	ENSG00000260641.1
hsa-mir-215	lnc-BCKDHB-2	ENSG00000260645.1
hsa-mir-203	lnc-BCKDHB-2	ENSG00000260645.1
hsa-mir-375	lnc-BCKDHB-2	ENSG00000260645.1
hsa-mir-141	ENSG00000260787.1	ENSG00000260787.1
hsa-mir-200a	ENSG00000260787.1	ENSG00000260787.1
hsa-mir-145	lnc-SP9-2	ENSG00000260868.1
hsa-mir-152	lnc-SP9-2	ENSG00000260868.1
hsa-mir-193b	lnc-SP9-2	ENSG00000260868.1
hsa-mir-205	lnc-SP9-2	ENSG00000260868.1
hsa-mir-31	lnc-SP9-2	ENSG00000260868.1
hsa-mir-141	CAPN10-AS1	ENSG00000260942.1
hsa-mir-200a	CAPN10-AS1	ENSG00000260942.1
hsa-mir-144	CAPN10-AS1	ENSG00000260942.1
hsa-mir-22	CAPN10-AS1	ENSG00000260942.1
hsa-mir-144	lnc-TRBV25OR9-2-1	ENSG00000260947.1
hsa-mir-429	lnc-TRBV25OR9-2-1	ENSG00000260947.1
hsa-mir-203	lnc-TRBV25OR9-2-1	ENSG00000260947.1
hsa-mir-508	lnc-TRBV25OR9-2-1	ENSG00000260947.1
hsa-mir-22	lnc-AC133485.1.1-4	ENSG00000260974.1
hsa-mir-205	lnc-CWF19L2-1	ENSG00000261098.1
hsa-mir-141	lnc-AL355149.1-2	ENSG00000261135.1
hsa-mir-200a	lnc-AL355149.1-2	ENSG00000261135.1
hsa-mir-429	lnc-ATMIN-2	ENSG00000261141.1
hsa-mir-183	lnc-PPP1R14D-1	ENSG00000261183.1
hsa-mir-141	lnc-SRRD-1	ENSG00000261188.1
hsa-mir-200a	lnc-SRRD-1	ENSG00000261188.1
hsa-mir-141	lnc-CAGE1-1	ENSG00000261189.1
hsa-mir-141	lnc-F13A1-2	ENSG00000261211.1
hsa-mir-200a	lnc-F13A1-2	ENSG00000261211.1
hsa-mir-215	lnc-PNPLA3-1	ENSG00000261251.1
hsa-mir-193b	lnc-PNPLA3-1	ENSG00000261251.1
hsa-mir-22	lnc-PNPLA3-1	ENSG00000261251.1
hsa-mir-215	lnc-KIAA1609-1	ENSG00000261286.1
hsa-mir-22	lnc-KIAA1609-1	ENSG00000261286.1
hsa-mir-215	lnc-SRPX2-1	ENSG00000261295.1
hsa-mir-144	lnc-GSG1L-1	ENSG00000261329.1
hsa-mir-22	lnc-GSG1L-1	ENSG00000261329.1
hsa-mir-141	lnc-FGFR1OP-2	ENSG00000261420.1
hsa-mir-22	lnc-FGFR1OP-2	ENSG00000261420.1
hsa-mir-22	MMP24-AS1	ENSG00000261582.1
hsa-mir-424	lnc-ABT1-3	ENSG00000261584.1
hsa-mir-203	lnc-RP4-604K5.1.1-2	ENSG00000261737.1
hsa-mir-203	lnc-C3orf77-1	ENSG00000261786.1
hsa-mir-22	LOXL1-AS1	ENSG00000261801.1
hsa-mir-422a	LINC00521	ENSG00000175699.8
hsa-mir-224	EIF3J-AS1	ENSG00000179523.4
hsa-mir-335	lnc-ZBTB17-1	ENSG00000179743.2
hsa-mir-335	lnc-KCNAB3-1	ENSG00000179859.7
hsa-mir-185	lnc-IRF2-3	ENSG00000180712.3
hsa-mir-185	lnc-PABPC4-1	ENSG00000182109.3
hsa-mir-185	lnc-C1orf86-1	ENSG00000182873.4
hsa-mir-197	lnc-C1orf86-1	ENSG00000182873.4
hsa-mir-708	lnc-CYS1-3	ENSG00000188525.3
hsa-mir-378	lnc-CYS1-3	ENSG00000188525.3
hsa-mir-185	lnc-TMEM211-2	ENSG00000203280.3
hsa-mir-378	lnc-JAM3-3	ENSG00000204241.3
hsa-mir-378	lnc-RNF39-4	ENSG00000204623.4
hsa-mir-185	lnc-FAM27E1.1-5	ENSG00000204802.3
hsa-mir-185	lnc-FAM75A4-3	ENSG00000204837.2
hsa-mir-378	lnc-FAM75A4-3	ENSG00000204837.2
hsa-mir-488	lnc-CA5A-2	ENSG00000205037.2
hsa-mir-378	lnc-IL2RA-3	ENSG00000213994.3
hsa-mir-185	APTR	ENSG00000214293.4
hsa-mir-378	lnc-ESR2-1	ENSG00000214770.2
hsa-mir-378	lnc-ZNF705A-2	ENSG00000215241.3
hsa-mir-185	lnc-NAV1-2	ENSG00000223396.2
hsa-mir-378	lnc-NAV1-2	ENSG00000223396.2
hsa-mir-378	LINC00205	ENSG00000223768.1
hsa-mir-488	lnc-PPIL2-1	ENSG00000224086.3
hsa-mir-378	lnc-LPA-3	ENSG00000224371.1
hsa-mir-197	lnc-WDR4-5	ENSG00000225731.1
hsa-mir-185	P3H2-AS1	ENSG00000225764.1
hsa-mir-708	KCNIP2-AS1	ENSG00000226009.1
hsa-mir-378	lnc-NECAP2-1	ENSG00000226029.1
hsa-mir-381	GAS1RR	ENSG00000226237.1
hsa-mir-185	MRPL23-AS1	ENSG00000226416.1
hsa-mir-708	ADIPOQ-AS1	ENSG00000226482.1
hsa-mir-544	lnc-AL713998.1-1	ENSG00000226497.1
hsa-mir-185	FAM66C	ENSG00000226711.2
hsa-mir-224	FAM66C	ENSG00000226711.2
hsa-mir-224	MGAT3-AS1	ENSG00000227188.1
hsa-mir-708	lnc-SRP9-1	ENSG00000227496.1
hsa-mir-378	lnc-MN1-2	ENSG00000227838.1
hsa-mir-422a	lnc-MN1-2	ENSG00000227838.1
hsa-mir-224	lnc-KLHL31-2	ENSG00000227885.1
hsa-mir-185	lnc-CLCNKB-1	ENSG00000227959.1
hsa-mir-378	lnc-CLCNKB-1	ENSG00000227959.1
hsa-mir-224	lnc-SLC16A4-1	ENSG00000227963.1
hsa-mir-378	RAPGEF4-AS1	ENSG00000228016.1
hsa-mir-488	RAPGEF4-AS1	ENSG00000228016.1
hsa-mir-197	lnc-TSHB-3	ENSG00000228035.1
hsa-mir-335	lnc-TSHB-3	ENSG00000228035.1
hsa-mir-378	lnc-ANGPTL2-1	ENSG00000228487.1
hsa-mir-185	lnc-PRDM13-2	ENSG00000228506.1
hsa-mir-494	lnc-SLC30A10-2	ENSG00000228536.1
hsa-mir-185	MEOX2-AS1	ENSG00000229108.1
hsa-mir-378	LINC00582	ENSG00000229228.1
hsa-mir-378	lnc-HYI-3	ENSG00000229444.1
hsa-mir-422a	lnc-HYI-3	ENSG00000229444.1
hsa-mir-708	lnc-VPS13D-1	ENSG00000229484.1
hsa-mir-378	lnc-PHIP-1	ENSG00000229495.1
hsa-mir-224	ACVR2B-AS1	ENSG00000229589.1
hsa-mir-708	LINC00341	ENSG00000229645.4
hsa-mir-378	LINC00341	ENSG00000229645.4
hsa-mir-224	SDCBP2-AS1	ENSG00000229728.1
hsa-mir-185	lnc-C6orf221-2	ENSG00000229852.2
hsa-mir-378	TFAP2A-AS1	ENSG00000229950.1
hsa-mir-708	lnc-FOXO1-2	ENSG00000230058.1
hsa-mir-224	lnc-ACBD6-1	ENSG00000230124.2
hsa-mir-335	lnc-ACBD6-1	ENSG00000230124.2
hsa-mir-378	lnc-ACBD6-1	ENSG00000230124.2
hsa-mir-708	lnc-PHF14-2	ENSG00000230435.1
hsa-mir-378	lnc-GNAI2-1	ENSG00000230454.1
hsa-mir-185	ZNF32-AS2	ENSG00000230565.1
hsa-mir-378	ZNF32-AS2	ENSG00000230565.1
hsa-mir-185	MORF4L2-AS1	ENSG00000231154.1
hsa-mir-197	lnc-ST7L-2	ENSG00000231246.1
hsa-mir-708	lnc-ST7L-2	ENSG00000231246.1
hsa-mir-411	lnc-ADAMTS16-5	ENSG00000231291.3
hsa-mir-127	lnc-ADAMTS16-5	ENSG00000231291.3
hsa-mir-185	lnc-C2orf42-1	ENSG00000231327.1
hsa-mir-335	FSIP2-AS1	ENSG00000231646.1
hsa-mir-335	NEBL-AS1	ENSG00000231920.1
hsa-mir-335	lnc-C21orf33-2	ENSG00000232124.1
hsa-mir-378	LINC00865	ENSG00000232229.1
hsa-mir-185	lnc-CXCR7-1	ENSG00000232328.1
hsa-mir-378	LINC00112	ENSG00000232401.1
hsa-mir-378	lnc-TTC21B-1	ENSG00000232411.1
hsa-mir-224	lnc-TTLL7-2	ENSG00000233008.1
hsa-mir-378	lnc-TTLL7-2	ENSG00000233008.1
hsa-mir-185	lnc-MN1-6	ENSG00000233521.1
hsa-mir-224	B4GALT1-AS1	ENSG00000233554.1
hsa-mir-544	lnc-SMARCAL1-4	ENSG00000233581.1
hsa-mir-335	lnc-CD40LG-2	ENSG00000234062.3
hsa-mir-224	lnc-PDGFA-1	ENSG00000234471.1
hsa-mir-544	LINC00440	ENSG00000234660.1
hsa-mir-224	lnc-CALM2-2	ENSG00000234690.2
hsa-mir-224	SLC25A25-AS1	ENSG00000234771.2
hsa-mir-335	SLC25A25-AS1	ENSG00000234771.2
hsa-mir-224	LINC01239	ENSG00000234840.1
hsa-mir-335	LINC01366	ENSG00000235172.3
hsa-mir-224	TTC21B-AS1	ENSG00000235192.1
hsa-mir-378	lnc-DALRD3-2	ENSG00000235236.1
hsa-mir-378	lnc-PEX26-1	ENSG00000235295.1
hsa-mir-422a	lnc-PEX26-1	ENSG00000235295.1
hsa-mir-378	LINC00894	ENSG00000235703.1
hsa-mir-378	EGOT	ENSG00000235947.1
hsa-mir-134	LINC00445	ENSG00000236036.1
hsa-mir-299	LINC00445	ENSG00000236036.1
hsa-mir-370	LINC00445	ENSG00000236036.1
hsa-mir-488	LINC00445	ENSG00000236036.1
hsa-mir-494	LINC00445	ENSG00000236036.1
hsa-mir-378	KDM4A-AS1	ENSG00000236200.1
hsa-mir-378	C10orf71-AS1	ENSG00000236208.1
hsa-mir-422a	C10orf71-AS1	ENSG00000236208.1
hsa-mir-410	C10orf71-AS1	ENSG00000236208.1
hsa-mir-224	lnc-C11orf30-1	ENSG00000236304.1
hsa-mir-185	lnc-EPHB4-1	ENSG00000236305.1
hsa-mir-224	lnc-RASGRP1-4	ENSG00000236914.3
hsa-mir-708	CNTFR-AS1	ENSG00000237159.1
hsa-mir-335	lnc-AGMAT-1	ENSG00000237301.1
hsa-mir-185	HOXD-AS2	ENSG00000237380.2
hsa-mir-378	HOXD-AS2	ENSG00000237380.2
hsa-mir-488	HOXD-AS2	ENSG00000237380.2
hsa-mir-378	lnc-PRMT6-3	ENSG00000237480.1
hsa-mir-488	lnc-ACD-1	ENSG00000237718.1
hsa-mir-378	lnc-RTN4-3	ENSG00000238018.1
hsa-mir-185	lnc-MDM4-2	ENSG00000240219.1
hsa-mir-224	lnc-OTOL1-1	ENSG00000240567.1
hsa-mir-378	lnc-OTOL1-1	ENSG00000240567.1
hsa-mir-378	lnc-FAM20C-3	ENSG00000240859.1
hsa-mir-185	lnc-ZMYM6-1	ENSG00000241014.1
hsa-mir-378	WWTR1-AS1	ENSG00000241313.2
hsa-mir-185	KCNAB1-AS1	ENSG00000242370.1
hsa-mir-185	lnc-AC145676.2.1-4	ENSG00000242474.1
hsa-mir-224	lnc-AC145676.2.1-4	ENSG00000242474.1
hsa-mir-185	lnc-FAM20C-5	ENSG00000242611.1
hsa-mir-185	lnc-TRRAP-1	ENSG00000242687.2
hsa-mir-378	lnc-TRRAP-1	ENSG00000242687.2
hsa-mir-185	lnc-PLCH1-3	ENSG00000243953.1
hsa-mir-185	lnc-HNRNPH1-1	ENSG00000244945.1
hsa-mir-185	LIFR-AS1	ENSG00000244968.2
hsa-mir-488	LIFR-AS1	ENSG00000244968.2
hsa-mir-378	lnc-GPR20-2	ENSG00000244998.1
hsa-mir-422a	lnc-GPR20-2	ENSG00000244998.1
hsa-mir-378	lnc-HMGB2-3	ENSG00000245213.2
hsa-mir-378	lnc-MPEG1-2	ENSG00000245571.2
hsa-mir-185	BDNF-AS	ENSG00000245573.3
hsa-mir-504	lnc-UBLCP1-5	ENSG00000245812.2
hsa-mir-197	lnc-UBLCP1-5	ENSG00000245812.2
hsa-mir-224	lnc-UBLCP1-5	ENSG00000245812.2
hsa-mir-224	lnc-ADAM10-1	ENSG00000245975.2
hsa-mir-335	ALDH1L1-AS2	ENSG00000246022.2
hsa-mir-378	ALDH1L1-AS2	ENSG00000246022.2
hsa-mir-504	lnc-METAP1-3	ENSG00000246090.2
hsa-mir-185	lnc-METAP1-3	ENSG00000246090.2
hsa-mir-378	lnc-TNFRSF10C-1	ENSG00000246130.1
hsa-mir-488	lnc-TNFRSF10C-1	ENSG00000246130.1
hsa-mir-488	LINC00920	ENSG00000246898.1
hsa-mir-185	lnc-NRG1-2	ENSG00000247134.2
hsa-mir-378	UBL7-AS1	ENSG00000247240.3
hsa-mir-185	lnc-B4GALT7-1	ENSG00000247679.2
hsa-mir-335	lnc-B4GALT7-1	ENSG00000247679.2
hsa-mir-185	lnc-HHIPL1-1	ENSG00000247970.2
hsa-mir-378	NRAV	ENSG00000248008.2
hsa-mir-335	UBA6-AS1	ENSG00000248049.2
hsa-mir-136	lnc-RASL11B-2	ENSG00000248115.1
hsa-mir-370	lnc-RASL11B-2	ENSG00000248115.1
hsa-mir-411	lnc-RASL11B-2	ENSG00000248115.1
hsa-mir-378	TRIM52-AS1	ENSG00000248275.1
hsa-mir-488	LINC01197	ENSG00000248441.2
hsa-mir-224	lnc-GRHL2-8	ENSG00000248599.1
hsa-mir-422a	lnc-C5orf63-3	ENSG00000248799.1
hsa-mir-488	lnc-FGF3-2	ENSG00000248844.2
hsa-mir-488	LINC01060	ENSG00000249378.1
hsa-mir-422a	LINC01091	ENSG00000249464.1
hsa-mir-504	lnc-FAM20C-6	ENSG00000249574.1
hsa-mir-185	lnc-FAM20C-6	ENSG00000249574.1
hsa-mir-335	lnc-SLC6A12-3	ENSG00000249695.2
hsa-mir-185	lnc-PTS-1	ENSG00000250303.2
hsa-mir-382	LINC01340	ENSG00000250331.1
hsa-mir-488	LINC00989	ENSG00000250334.1
hsa-mir-224	lnc-STIM1-1	ENSG00000250404.1
hsa-mir-378	lnc-STIM1-1	ENSG00000250404.1
hsa-mir-197	lnc-SNX25-1	ENSG00000250410.1
hsa-mir-504	lnc-ALDH7A1-1	ENSG00000250602.1
hsa-mir-488	lnc-EXOC1-1	ENSG00000250821.1
hsa-mir-185	lnc-CYB5R2-3	ENSG00000251364.2
hsa-mir-224	lnc-CYB5R2-3	ENSG00000251364.2
hsa-mir-488	lnc-CYB5R2-3	ENSG00000251364.2
hsa-mir-335	lnc-FAM160A1-2	ENSG00000251455.1
hsa-mir-378	lnc-FAM160A1-2	ENSG00000251455.1
hsa-mir-185	lnc-CPEB4-2	ENSG00000253428.1
hsa-mir-197	lnc-RP11-422N16.3.1-4	ENSG00000253434.1
hsa-mir-708	lnc-BOD1-1	ENSG00000253686.1
hsa-mir-488	lnc-BOD1-1	ENSG00000253686.1
hsa-mir-335	RBPMS-AS1	ENSG00000254109.1
hsa-mir-197	lnc-LSM11-7	ENSG00000254135.1
hsa-mir-224	lnc-CHCHD7-1	ENSG00000254254.1
hsa-mir-185	lnc-CYorf17-2	ENSG00000254488.1
hsa-mir-224	lnc-BTBD10-2	ENSG00000254670.1
hsa-mir-378	lnc-MAP6-4	ENSG00000254814.1
hsa-mir-224	STX17-AS1	ENSG00000255145.1
hsa-mir-708	lnc-ARCN1-1	ENSG00000255176.1
hsa-mir-335	lnc-ARCN1-1	ENSG00000255176.1
hsa-mir-136	lnc-RP11-315O6.2.1-1	ENSG00000255337.1
hsa-mir-378	lnc-SLC1A2-1	ENSG00000255443.1
hsa-mir-504	lnc-FZD4-1	ENSG00000255471.1
hsa-mir-335	lnc-FZD4-1	ENSG00000255471.1
hsa-mir-185	lnc-AC130352.1-2	ENSG00000255495.1
hsa-mir-488	lnc-CAPZA3-1	ENSG00000255648.1
hsa-mir-378	FAM222A-AS1	ENSG00000255650.1
hsa-mir-378	lnc-SSPN-2	ENSG00000255968.1
hsa-mir-335	LINC01152	ENSG00000256124.1
hsa-mir-378	lnc-CPSF7-3	ENSG00000256443.1
hsa-mir-378	lnc-UBE2N-1	ENSG00000257252.1
hsa-mir-488	lnc-TESC-1	ENSG00000257279.1
hsa-mir-708	lnc-C12orf29-1	ENSG00000257940.1
hsa-mir-185	lnc-TOMM20-1	ENSG00000258082.1
hsa-mir-224	lnc-NDRG2-1	ENSG00000258471.1
hsa-mir-488	RHOXF1-AS1	ENSG00000258545.1
hsa-mir-185	LINC00645	ENSG00000258548.1
hsa-mir-224	FAM181A-AS1	ENSG00000258584.1
hsa-mir-299	lnc-RTL1-1	ENSG00000258663.1
hsa-mir-370	lnc-RTL1-1	ENSG00000258663.1
hsa-mir-495	lnc-RTL1-1	ENSG00000258663.1
hsa-mir-185	lnc-ARID4A-4	ENSG00000258682.1
[truncated: 31 more rows]
