# Supplementary material for: Discovering the ‘Dark matters’ in expression data of miRNA based on the miRNA-mRNA and miRNA-lncRNA networks
Source: BMC Bioinformatics. 2018 Oct 16;19:379. doi: 10.1186/s12859-018-2410-0 (PMC6192342; doi:10.1186/s12859-018-2410-0)
Supplement: Supplementary file 4 — The activity scores of 120 miRNAs in BMLN are shown in Additional file 4. (XLSX 13 kb) [file 12859_2018_2410_MOESM4_ESM.xlsx]

## Sheet: Sheet1
miRNA	Activity Score
hsa-miR-141	26.561
hsa-miR-22	24.4899
hsa-miR-200a	22.2884
hsa-miR-378	10.5402
hsa-miR-144	10.5356
hsa-miR-31	8.6914
hsa-miR-429	8.33011
hsa-miR-203	6.48929
hsa-miR-200c	6.33333
hsa-miR-200b	5.45283
hsa-miR-215	5.21551
hsa-miR-375	4.08481
hsa-miR-205	3.71267
hsa-miR-193b	3.58231
hsa-miR-224	3.56789
hsa-miR-185	3.34102
hsa-miR-148a	3.10753
hsa-miR-452	2.68254
hsa-miR-196a-1	2.57895
hsa-miR-196a-2	2.48101
hsa-miR-9-1	2.20225
hsa-miR-451	1.60656
hsa-miR-424	1.57808
hsa-miR-486	1.5
hsa-miR-9-2	1.5
hsa-miR-181c	1.49254
hsa-miR-335	1.35441
hsa-miR-488	1.34571
hsa-miR-362	1.23469
hsa-miR-146a	1.12281
hsa-miR-675	1
hsa-miR-15a	0.988304
hsa-miR-146b	0.890909
hsa-miR-133b	0.837209
hsa-miR-135b	0.818182
hsa-miR-542	0.780488
hsa-miR-20b	0.618321
hsa-miR-133a-1	0.5
hsa-miR-19b-1	0.418605
hsa-miR-551b	0.409091
hsa-miR-206	0.342173
hsa-let-7b	0.336449
hsa-miR-589	0.333333
hsa-miR-181d	0.328947
hsa-miR-652	0.285714
hsa-miR-21	0.284034
hsa-miR-378c	0.271739
hsa-miR-708	0.265356
hsa-miR-30e	0.253968
hsa-miR-182	0.247432
hsa-miR-130a	0.24
hsa-miR-223	0.232438
hsa-miR-135a-1	0.190476
hsa-miR-1-2	0.173913
hsa-miR-125a	0.156863
hsa-miR-193a	0.145455
hsa-miR-30a	0.142857
hsa-miR-133a-2	0.125
hsa-miR-1-1	0.118421
hsa-miR-508	0.113924
hsa-miR-183	0.104381
hsa-miR-504	0.101937
hsa-let-7a-2	0.0909091
hsa-miR-363	0.0883315
hsa-miR-34c	0.0825688
hsa-miR-132	0.0760999
hsa-miR-422a	0.0729073
hsa-miR-155	0.0655957
hsa-miR-342	0.0634921
hsa-miR-222	0.0590164
hsa-miR-101-1	0.0588235
hsa-miR-197	0.050834
hsa-miR-383	0.0457433
hsa-miR-450a-1	0.0434783
hsa-miR-145	0.0314304
hsa-miR-26a-1	0.027027
hsa-miR-24-2	0.0243902
hsa-miR-187	0.0241935
hsa-miR-16-1	0.0229885
hsa-miR-500b	0.0212766
hsa-miR-190	0.0155172
hsa-miR-136	0.0148987
hsa-miR-139	0.0138889
hsa-miR-129-2	0.0136986
hsa-miR-192	0.0117955
hsa-miR-195	0.0109966
hsa-miR-211	0.00972053
hsa-miR-204	0.00970874
hsa-miR-16-2	0.00943396
hsa-miR-217	0.008867
hsa-miR-100	0.00884956
hsa-miR-544	0.00864865
hsa-miR-370	0.00808898
hsa-miR-152	0.00777202
hsa-miR-377	0.00743187
hsa-miR-485	0.00657895
hsa-miR-107	0.00608108
hsa-miR-503	0.00505051
hsa-miR-127	0.00497512
hsa-miR-411	0.00485437
hsa-miR-150	0.00458015
hsa-miR-212	0.00443459
hsa-miR-382	0.00431034
hsa-miR-299	0.00409417
hsa-miR-758	0.0034632
hsa-miR-494	0.00315706
hsa-miR-376c	0.00134048
hsa-miR-381	0.00132979
hsa-miR-425	0.00129702
hsa-miR-410	0.00119332
hsa-miR-96	0.000931099
hsa-miR-134	0.000893655
hsa-miR-433	0.000832639
hsa-miR-495	0.000789266
hsa-miR-592	0.000762777
hsa-miR-338	0.00059988
hsa-miR-539	0.000590667
hsa-miR-93	0.000558347
hsa-miR-149	0.000552486
hsa-miR-326	0.000489956
